1 **Controlled-release urea combined with potassium chloride improved the soil**  
2 **fertility and growth of Italian ryegrass**

3 Jibiao Geng<sup>1</sup>, Xiuyi Yang<sup>1\*</sup>, Xianqi Huo<sup>1</sup>, Jianqiu Chen<sup>1,2</sup>, Shutong Lei<sup>1</sup>, Hui Li<sup>1</sup>, Ying  
4 Lang<sup>1</sup>, Qianjin Liu<sup>1\*</sup>

5 <sup>1</sup>Shandong Provincial Key Laboratory of Water and Soil Conservation and Environme  
6 ntal Protection, State Key Laboratory of Nutrition Resources Integrated Utilization,  
7 College of Agriculture and Forestry Science/Resources and Environment,  
8 Linyi University, Linyi, Shandong 276000, China

9 <sup>2</sup>Kingenta Ecological Engineering Group Co., Ltd., Linshu, Shandong 276700, China

10 \*these authors are corresponding authors

11 Corresponding authors:

12 Xiuyi Yang. Email: woshiyangxiuyi@163.com.

13 Qianjin Liu. Email: liuqianjin@163.com.

14 **Abstract**

15 **A field experiment with a split-plot design was conducted to study the effect of**  
16 **nitrogen fertilizer type combined with different potassium fertilizer rates on the**  
17 **soil fertility and growth of Italian ryegrass. The main plots were assigned to**  
18 **controlled-release urea (CRU) and common urea, while low, moderate and high**  
19 **potassium chloride (KCl) rates (150, 300 and 450 kg ha<sup>-1</sup>, respectively) were**  
20 **assigned to the subplots. The results showed compared with the common urea,**  
21 **the CRU significantly increased the SPAD value, plant height, leaf area, and**  
22 **photosynthetic index. Moreover, the dry and fresh yields of the CRU increased**  
23 **by 10.9-25.3% and 11.8-17.7%, respectively. At the same time, compared with**  
24 **the KCl150 and KCl450 treatments, the KCl300 treatment resulted in better**  
25 **plant growth. Overall, the CRU×KCl300 maximized the soil inorganic nitrogen**  
26 **and different soil potassium forms. The root length, volume, surface area,**  
27 **average diameter, tips and branches were also improved, and there was a**  
28 **significant N×K interaction effect on the tips. Our analysis corroborated the**  
29 **CRU combined with 300 kg ha<sup>-1</sup> KCl fertilization enhances crop growth by**

30 **improving leaf photosynthesis, soil fertility, and yield and should be**  
31 **recommended as the best fertilizer ratio for Italian ryegrass production.**

32 **Keywords:** Controlled-release urea; growth characteristics; Italian ryegrass;  
33 potassium chloride; soil fertility, yield

#### 34 **Introduction**

35 Grassland accounts for 41.7% of China's total land area (Liu *et al.*, 2018). For a long  
36 time, as the main means of production and material basis, grasslands have made  
37 important contributions to the development of animal husbandry, and grasslands have  
38 an important ecological function that plays a central role in water and soil  
39 conservation, air purification, climate regulation and biodiversity conservation  
40 (Binder *et al.*, 2018). Italian ryegrass (*Lolium multiflorum* L.) is a globally cultivated  
41 grass. This grass has many tillers at its roots, grows quickly and has good grazing  
42 resistance. Italian ryegrass has a strong adaptability and high yield and nutrition,  
43 which play a role in improving soil (Hussain *et al.*, 2018; Svatos and Abbott, 2019).  
44 Italian ryegrass is widely used in parks, golf courses and other recreational sporting  
45 areas as the first choice of lawn grass in foreign countries (Fan *et al.*, 2018). Various  
46 production technologies and late management measures have also become new  
47 research topics. At present, research on ryegrass in lawns, playgrounds and other  
48 fields in China is immature. A large number of researchers have focused on  
49 management technology after ryegrass planting (Alves dos Santos *et al.*, 2018; He *et*  
50 *al.*, 2020).

51 Nitrogen is not only the basis of forage genetic material but also the composition  
52 of many important organic compounds (Bolinder *et al.*, 2010). It is very important for  
53 life cycle activities and the yield and nutritional quality of forage. Italian ryegrass  
54 does not have the ability to fix nitrogen, so nitrogen in the soil is a key factor in grass  
55 growth and development (Woods *et al.*, 2018). The application of nitrogen fertilizer  
56 can significantly improve the yield of Italian ryegrass, and the plant can absorb both  
57 ammonium and nitrate nitrogen (Cavalli *et al.*, 2016). Moreover, Italian ryegrass is a  
58 fast-growing forage grass with a high N requirement and, therefore, strongly relies on  
59 N soil content to maintain adequate forage yield (Masoni *et al.*, 2015).

60 The fertilizer utilization rate in China is generally low, mainly due to the rapid  
61 dissolution of instant fertilizer after it is applied to the soil (Wang *et al.*, 2018). The  
62 crop cannot absorb and utilize nitrogen in time, which results in the loss of most of  
63 the nitrogen in gaseous or water-soluble forms and causes a series of environmental  
64 problems, such as eutrophication of surface water, nitrate pollution of groundwater  
65 and agricultural products, and ammonia and nitrogen oxides emitted to the ozone  
66 layer (Ata-Ul-Karim *et al.*, 2017). In addition, it is difficult to apply fertilizer to  
67 Italian ryegrass after every cutting, so decreasing the fertilizer application frequency  
68 and improving the yield and quality of Italian ryegrass are the key problems to  
69 address in the planting process (Martin *et al.*, 2017). An effective solution may be to  
70 develop a new type of slow-release fertilizer to meet the needs of crop growth.

71 In recent years, controlled-release urea (CRU) has been used worldwide (Geng *et*  
72 *al.*, 2016; Li *et al.*, 2018; Liu *et al.*, 2019). CRU can release nitrogen slowly in the  
73 form of a resin polymer coating, continuously supply nutrients needed for ryegrass  
74 growth, decrease the number of topdressings and labour intensity in the later stage,  
75 simplify cultivation technology, save time and labour, and reduce environmental  
76 pollution (Gaylord *et al.*, 1975).

77 Potassium chloride (KCl) is commonly used in agricultural production. It has a  
78 low price and high nutrient content, and the application of appropriate amounts can  
79 promote the growth of Italian ryegrass (McDonnell, *et al.*, 2018). In addition,  
80 potassium can improve the photosynthetic capacity and disease resistance of plants  
81 and then extend the green period (Hasanuzzaman *et al.*, 2018). In addition, a single  
82 application of nitrogen and potassium or mixed application of different proportions  
83 can increase the fresh yield of Italian ryegrass, but the effect of a mixed application is  
84 better than that of a single application (Oliveira *et al.*, 2017). According to the supply  
85 and demand curve of soil for nutrient elements, the most appropriate fertilization  
86 amount and fertilization type can be formulated.

87 Nitrogen can improve photosynthesis and thus dry matter production (Jarvis,  
88 1987). Potassium is very important for root growth and disease resistance (Snyder and  
89 Cisar, 2000). The possible interactions between the two nutrients are unknown, as

90 they have not been sufficiently studied in Italian ryegrass. In previous studies on the  
91 effect of N×K fertilizer application on crop growth, the positive interaction of N and  
92 K reduced the cost of fertilizer and contributed to food security (Yang *et al.*, 2016a,  
93 2016b). Nitrogen fertilizer application increases the plant potassium absorption  
94 efficiency, and potassium fertilizer application resolves the problem of nitrogen  
95 pollution by inducing in crops a high nitrogen absorption efficiency (Dong *et al.*,  
96 2010). Eventually, the mutual promotion of nitrogen and potassium enhances the yield  
97 and quality of crops (Yang *et al.*, 2016a). This is a feasible way to increase the  
98 potassium fertilizer input and improve the nitrogen utilization efficiency.  
99 Understanding the mechanism underlying the N×K interaction is vital to guide the  
100 best practice of nutrient management in agricultural production.

101 Furthermore, there are few reports on the interaction application effects of CRU  
102 combined with KCl on Italian ryegrass growth. Hence, the objective of this study was  
103 to investigate the effects of CRU in combination with KCl on (i) soil inorganic  
104 nitrogen ( $\text{NO}_3^-$ -N and  $\text{NH}_4^+$ -N), (ii) soil potassium forms (available potassium,  
105 water-soluble potassium, exchangeable potassium and nonexchangeable potassium),  
106 (iii) growth and photosynthesis characteristics, and (iv) Italian ryegrass yield and  
107 fertilizer use efficiency.

## 108 **Materials and methods**

### 109 *Experimental site and material*

110 The field experiment was arranged at the experimental base of the College of  
111 Agriculture and Forestry Science, Linyi University, Linyi city, Shandong Province  
112 (35°06'N, 118°17'E) in 2019, and this site has a continental climate typical of  
113 temperate monsoon areas. The temperature and relative humidity were  $30 \pm 5$  °C and  
114  $45 \pm 5\%$  mm, respectively. The experimental site has four distinct seasons and  
115 substantial light. The tested soil is sandy loam, which is classified as Typic Hapludalf  
116 according to the USDA classification (Soil Survey Staff 1999). The basic soil  
117 properties are listed in Table 1.

118 The tested forage is 'Bluesign' Italian ryegrass, which is produced by Suqian  
119 Chengzhiyang Seed Industry Co., Ltd., China. The seeding rate of the Italian ryegrass

120 was 25 kg ha<sup>-1</sup>. The fertilizers used included CRU and ordinary fertilizers. The CRU  
121 (containing N 43%, with a release period of almost 3 months in distilled water at  
122 25 °C) (Fig. 1) fertilizer was produced by the State Key Laboratory of Nutrition  
123 Resources Integrated Utilization, China. The CRU fertilizer was formulated as round  
124 particles with a regular shape and smooth surface, and it was coated with an epoxy  
125 resin (low curing shrinkage, strong adhesion and chemical resistance). The ordinary  
126 fertilizers included urea (containing N 46%), calcium superphosphate (containing  
127 P<sub>2</sub>O<sub>5</sub> 14%), and KCl (containing K<sub>2</sub>O 60%), which were provided by Jinzhengda  
128 Ecological Engineering Group Co., Ltd., and Kingenta Ecological Engineering Group  
129 Co., Ltd., China.

### 130 *Experimental design*

131 A split-plot design with three replications was used for the experiment. Specifically,  
132 the nitrogen types (CRU and urea) were the main plots, KCl rates (150, 300 and 450  
133 kg ha<sup>-1</sup>) were the subplots, and no N or K fertilization was the control. The main plot  
134 covered an area of 45 m<sup>2</sup> (3 m wide and 15 m long), and the subplot covered an area  
135 of 15 m<sup>2</sup> (3 m wide and 5 m long). Each plot received a basal application of 300 kg  
136 ha<sup>-1</sup> N and 200 kg ha<sup>-1</sup> P<sub>2</sub>O<sub>5</sub>. All fertilizers (except common urea) were applied once  
137 with hands before sowing seeds. In particular, urea was applied twice in total, with  
138 60% before sowing seeds and 40% after the second clipping stage. The Italian  
139 ryegrass was sown on April 4, 2019. CRU (10 g) fertilizer was weighed and placed  
140 into the mesh bag (8 cm width and 10 cm length), the bags were sealed, and this  
141 process was repeated 18 times. Then, these bags were put into the ploughed soil layer  
142 before the Italian ryegrass was sown to determine the release characteristics of the  
143 CRU fertilizer buried in the soil.

### 144 *Sampling and measurement*

145 The release of the CRU in the soil was determined by the buried bag method.  
146 Similarly, 10 g of CRU particles were put in a mesh bag (8 cm wide and 10 cm long)  
147 buried in a cement tank at a depth of 15-20 cm during fertilization. The bags were  
148 collected on the 10<sup>th</sup>, 20<sup>th</sup>, 30<sup>th</sup>, 60<sup>th</sup>, 90<sup>th</sup>, and 120<sup>th</sup> days after burial. Three bags were  
149 collected each time, washed and dried to constant weight at 60 °C, and the nitrogen

150 release rate was calculated according to the weight of the remaining fertilizer  
151 particles.

152 Soil and plant samples were collected on May 18, 2019 (first clipping), June 14,  
153 2019 (second clipping), July 16, 2019 (third clipping), and August 10, 2019 (fourth  
154 clipping), and the physiological indexes of Italian ryegrass under different treatments  
155 were observed and measured.

156 The 0-20 cm soil samples were collected by a 5-point sampling method (2  
157 sampling points in the fertilizer row, 3 sampling points in the plant row). The contents  
158 of  $\text{NO}_3^-$ -N and  $\text{NH}_4^+$ -N in fresh soil ( $0.01 \text{ mol L}^{-1} \text{ CaCl}_2$  extraction) were determined  
159 immediately using an AA3 continuous flow analyser (Bran-Luebbe, Norderstedt,  
160 Germany). The remaining soil was dried by naturally existing air and ground through  
161 2 mm and 0.25 mm sieves, and the organic matter (potassium dichromate external  
162 heating method), soil total N (semi micro Kelvin method), available phosphorus (pH  
163 8.5,  $0.5 \text{ mol L}^{-1} \text{ NaHCO}_3$  extraction, molybdenum blue colorimetry) and available  
164 potassium ( $1 \text{ mol L}^{-1} \text{ NH}_4\text{OAc}$  extraction, flame photometer method) contents were  
165 determined (Zheng *et al.*, 2016).

166 The leaf area of Italian ryegrass was measured by a leaf area meter (Yaxin-1241,  
167 Yaxinliyi, China). The SPAD value was measured by a hand-held chlorophyll meter  
168 (SPAD-502, Minolta, Japan). Besides, the Li-6400 portable photosynthetic apparatus  
169 (LI-COR, Lincoln, NE, USA) was also used for the determination. The leaf  
170 photosynthetic indicators were measured from 9:00-10:00 a.m. Under sunny and  
171 cloudless weather, the net photosynthetic rate ( $P_n$ ), stomatal conductance ( $G_s$ ),  
172 intercellular carbon dioxide concentration ( $C_i$ ) and transpiration rate ( $T_r$ ) were  
173 measured before the second clipping.

174 After measuring the physiological indexes of the plant, ten successive plants  
175 above the roots from each subplot were clipped with scissors, and the height of the  
176 stubble was the same as that of the ground. The fresh weight of the yield of each  
177 treatment was recorded. Then, the clipped grass was sealed in the file bag according  
178 to the treatment label, placed in the oven at  $105 \text{ }^\circ\text{C}$  for 30 minutes, and dried at  $65 \text{ }^\circ\text{C}$   
179 for 72 hours, and then, the dry weight of the yield was recorded. Finally, the nitrogen

180 and potassium contents of the plants were analysed. The plant total nitrogen contents  
181 were determined by digestion with H<sub>2</sub>SO<sub>4</sub>-H<sub>2</sub>O using the micro-Kjeldahl method. The  
182 potassium content of the plant was digested by H<sub>2</sub>SO<sub>4</sub>-H<sub>2</sub>O and determined by a  
183 flame photometer. The nitrogen and potassium uptake were calculated according to  
184 the nitrogen and potassium content and dry mass weight of each plot. The nitrogen  
185 use efficiency (NUE) and potassium use efficiency (KUE) were calculated (Rietra *et*  
186 *al.*, 2017).

187 The root samples were scanned with a flatbed image scanner (Epson  
188 Expression/STD LC-4800 scanner). The images were analysed by WinRHIZO  
189 commercial software (Regent Instruments, 2001) to determine the root volume, total  
190 length, diameter, surface area, and numbers of tips and branches.

#### 191 *Statistical analyses*

192 Microsoft Excel 2010 was employed for data processing, and Sigma Plot software  
193 version 10 (MMIV, Systat Software Inc., San Jose, CA, USA) was used to draw the  
194 figures. Data were subjected to analysis of variance (ANOVA) and mean separation  
195 tests as a split-plot factorial design with three replications. Concretely, the data were  
196 analysed using Statistical Analysis System version 9.2 (SAS Institute Cary, NC, 2010)  
197 with a two-way ANOVA at a significance level of 0.05, with nitrogen type and  
198 potassium rate as the independent variables. Two-way ANOVAs were performed to  
199 determine the effects of N, K and their interactions on the leaf area, leaf SPAD, leaf  
200 photosynthesis chlorophyll parameters, root morphology, yield and nutrient uptake of  
201 Italian ryegrass. One-way ANOVAs were performed to test for significant differences  
202 between treatments of NH<sub>4</sub><sup>+</sup>-N, NO<sub>3</sub><sup>-</sup>-N, and soil K informs. A Duncan multiple range  
203 test was carried out to determine if significant (p<0.05) differences occurred between  
204 individual treatments (Tang and Feng, 2002).

## 205 **Results**

### 206 *Release characteristics of the CRU fertilizer*

207 The release characteristics of the CRU fertilizer in the soil were released in the form  
208 of “S”, reaching 80% in approximately 100 days (Fig. 1). The release period of the  
209 CRU in the soil was almost 120 days: the release rate was slow within 0~60 days, the

210 release rate increased within 60~90 days, and the nutrient decline period was within  
211 90~120 days, which met the nitrogen demand of Italian ryegrass.

#### 212 *Soil inorganic nitrogen and potassium form*

213 The contents of  $\text{NO}_3^-$ -N and  $\text{NH}_4^+$ -N in the soil in the control treatment were the  
214 lowest among all the treatments in the whole plant growing season (Fig. 2). With the  
215 increase in the KCl application rate, the contents of  $\text{NO}_3^-$ -N and  $\text{NH}_4^+$ -N in the soil  
216 changed little, which was not related to the type of nitrogen application. However, at  
217 the early stage of growth, the contents of  $\text{NO}_3^-$ -N and  $\text{NH}_4^+$ -N in the urea treatment  
218 were higher than those in the CRU treatment, but after the second clipping, the  
219 contents of  $\text{NO}_3^-$ -N and  $\text{NH}_4^+$ -N in the urea treatment decreased rapidly; in addition,  
220 the contents of  $\text{NO}_3^-$ -N and  $\text{NH}_4^+$ -N in the urea treatment were lower than those in the  
221 CRU treatment.

222 Overall, the contents of available K, water-soluble K, exchangeable K and  
223 nonexchangeable K were significantly affected by the KCl application rate, and of the  
224 treatments, the control treatment had the lowest values in different developmental  
225 stages (Fig. 3). The contents of soil available K, water-soluble K and  
226 nonexchangeable K decreased gradually, but that of exchangeable K showed a  
227 fluctuating trend. Regardless of which type of nitrogen fertilizer was combined, the  
228 contents of soil available potassium, water soluble potassium and exchangeable  
229 potassium improved with the increase in the KCl application rate, and there was a  
230 significant difference between the different potassium fertilizer treatments.

#### 231 *Plant height and leaf area*

232 In the whole growth period of Italian ryegrass, the plant heights of the different  
233 fertilization treatments increased first and then decreased (Table 2). There was no  
234 significant difference between the different fertilization treatments at the first and  
235 second clipping stages, but the advantage of the CRU treatment group was obvious; in  
236 addition, the average value was higher than that of the control treatment. During the  
237 mowing period of the third and fourth clippings, Italian ryegrass growth was in the  
238 transition period from maturity to senescence, the plant demand for nutrients  
239 decreased, and the ability to absorb fertilizer also decreased. Under the same amount



240 of applied nitrogen, the plants in the KCl150 and KCl300 treatments were taller, and  
241 those in the KCl450 treatment were shorter. At the same time, the plant height of the  
242 CRU treatment group was significantly greater than that of the urea treatment groups.

243 Similarly, the leaf area of Italian ryegrass in the whole growth period increased  
244 first and then decreased with the growth of the plant (Table 3). At the second clipping  
245 period, the apparent leaf area increased the fastest. The leaves of the plants were long  
246 and thin, and there was no difference between the fertilization treatments at the first  
247 and second clipping stages, but fertilization was more suitable for its growth; in  
248 addition, the leaf area of the plants with fertilization was relatively large. During the  
249 third and fourth clipping stages, in comparison with the control and common urea  
250 treatments, the CRU treatments resulted in a significant difference, which indicated  
251 that the CRU could delay plant senescence to some extent. In addition, the effect of  
252 nitrogen fertilizer on ryegrass leaf area was greater than that of KCl fertilizer, and the  
253 sustainability of combined application is more important. There was no significant  
254 N×K interaction effect on the plant height and leaf area (except at the third clipping).

#### 255 *Leaf SPAD and photosynthetic index*

256 The effect of different fertilization treatments on the SPAD value of Italian ryegrass  
257 was different (Table 4). At the first clipping stage, the SPAD value of the  
258 CRU×KCl300 treatment was the highest, 17.1% higher than that of the control  
259 treatment. During the whole growth period of Italian ryegrass, the SPAD value  
260 increased first and then decreased, and the SPAD value of the CRU treatment was  
261 higher than that of the common urea treatment. Under the three levels of KCl fertilizer,  
262 the SPAD value of the KCl150 treatment in the whole growth period was low, which  
263 indicates that the insufficient use of potassium had a certain impact on the SPAD  
264 value. The SPAD value of the CRU×KCl300 treatment was the highest at the third  
265 and fourth stages, while the effect of nitrogen on the SPAD value of ryegrass was  
266 greater at the later stage. In comparison with common urea, the application of CRU  
267 had a greater advantage in improving the SPAD value. There was no significant N×K  
268 interaction effect on the SPAD value (except at the second clipping).

269 The nitrogen fertilizer types and KCl rates affected the photosynthesis indicators,

270 but there was no significant difference between their interaction effects (Table 5). In  
271 comparison to the urea treatments, the CRU treatment improved the  $P_n$ ,  $G_s$  and  $T_r$  and  
272 lowered the  $C_i$ . In addition, the photosynthesis indicators increased with increasing  
273 KCl rates. There was no significant N×K interaction effect on the photosynthesis  
274 indicators (except  $T_r$ ), and of the treatments, the CRU×KCl300 treatment performed  
275 the best in terms of Italian ryegrass leaf photosynthesis.

#### 276 *Root morphology*

277 The nitrogen fertilizer types and potassium fertilizer rates significantly affected the  
278 root morphology (total length, surface area, average diameter, root volume, and  
279 numbers of tips and branches) (Table 6). Concretely, the CRU treatments increased  
280 these parameters compared with the urea treatments. In addition, the moderate KCl  
281 rate treatments markedly improved the root morphology compared with the low- and  
282 high-KCl-rate treatments despite any nitrogen fertilizer type. However, there was no  
283 significant N×K interaction effect (except the tips), and of the treatments, the  
284 CRU×KCl300 treatment performed the best in terms of Italian ryegrass root growth.

#### 285 *Yield*

286 The fresh and dry Italian ryegrass yields of the CRU treatment increased continuously  
287 in four clipping periods (Tables 7 and 8), those of the control treatment and common  
288 urea treatment decreased at the third clipping stage, and the difference was significant.  
289 In the whole growth period, under the CRU treatment conditions, there was no  
290 difference in the treatment with different amounts of KCl fertilizer, which indicated  
291 that the factors affecting the fresh and dry yields of Italian ryegrass were due more to  
292 nitrogen fertilizer than to potassium fertilizer. However, there was no significant N×K  
293 interaction effect on the yield. When clipping at the second stage, the highest dry  
294 yields of the CRU×KCl300 and CRU×KCl450 treatments were  $1.75 \text{ g plant}^{-1}$ , which  
295 were 5.4% and 2.9% higher than those of the urea×KCl300 and urea×KCl450  
296 treatments, respectively, at the same potassium rate. During the third and fourth stages,  
297 the growth trend of the plants increased slowly, the demand for nutrients decreased,  
298 and the CRU slowly released nitrogen for plant growth. Thus, CRU was more  
299 beneficial than common urea. In addition, potassium fertilizer had little influence on

300 the yield. There was no significant N×K interaction effect on the dry yield and fresh  
301 yield (except at the fourth clipping).

### 302 *Nitrogen and potassium use efficiency*

303 The nitrogen fertilizer application significantly affected nitrogen uptake and NUE,  
304 and the potassium fertilizer application significantly affected potassium uptake and  
305 KUE (Table 9). The nitrogen uptake and NUE of the CRU treatments were  
306 significantly higher than those of the urea treatments. In addition, potassium uptake  
307 increased with increasing KCl rate, but the KUE had the opposite trend. In total, the  
308 CRU×KCl300 treatment resulted in the highest nutrient uptake and use efficiency.

## 309 **Discussion**

### 310 *Soil inorganic nitrogen and potassium form*

311 The contents of soil inorganic nitrogen ( $\text{NO}_3^-$ -N and  $\text{NH}_4^+$ -N) in the 0-20 cm soil  
312 layer were greatly affected by fertilization and were related to the type of fertilizer,  
313 the frequency of fertilization and the amount of fertilization (Zheng *et al.*, 2016). In  
314 the present study, the contents of nitrate nitrogen and ammonium nitrogen at depths of  
315 0-20 cm were significantly affected by nitrogen fertilization, but no significant  
316 difference was found between the potassium fertilization applications. In the  
317 beginning, urea rapidly dissolved and released substantial nitrogen, while the CRU  
318 initially released less nitrogen; thus, the soil inorganic nitrogen content of the urea  
319 treatment was higher than that of the CRU treatment at the first clipping stage.  
320 However, due to the continuous release of nitrogen from the CRU, the contents of  
321  $\text{NO}_3^-$ -N and  $\text{NH}_4^+$ -N increased significantly from the second clipping stage to the  
322 fourth clipping stage compared with that in the urea treatment. Zheng *et al.* (2016)  
323 also found that the application of CRU mixed with urea significantly increased the  
324 soil inorganic nitrogen compared with the application of normal urea, especially in the  
325 later growth stage. The effect of the KCl rate on soil inorganic nitrogen was not  
326 obvious during the whole growth stage of Italian ryegrass.

327 The application of potassium fertilizer significantly affects the content of soil  
328 potassium and the form of soil potassium (Yang *et al.*, 2017; Li *et al.*, 2017). In the  
329 present study, potassium application significantly increased the contents of soil

330 available K, water-soluble K, exchangeable K and non-exchangeable K, similar to  
331 other research results (Kurbah and Dixit, 2019). However, quick-acting fertilizers  
332 such as KCl are easily converted into non-exchangeable K, which leads to a decrease  
333 in soil potassium availability (Chen *et al.*, 2020). In total, the contents of soil available  
334 K, water-soluble K, exchangeable K and non-exchangeable K increased with  
335 increasing KCl rate. The contents of soil available K and water-soluble K had a  
336 significant positive correlation, where a similar presence was also found in  
337 exchangeable K and non-exchangeable K (Table 10). The water-soluble K contributed  
338 the most to  $\text{NO}_3^-$ -N, and the available K had similar effects on  $\text{NH}_4^+$ -N. In addition,  
339 the contents of soil available potassium in the KCl300 and KCl450 treatments were  
340 similar. Thus, a moderate amount of potassium fertilizer could maintain a high  
341 potassium content in the soil, which would supply enough potassium nutrition for  
342 Italian ryegrass (Jiménez-Calderón *et al.*, 2018). In addition, we found that the  
343 interaction effect of N×K on soil available potassium or inorganic nitrogen was not  
344 obvious during the whole growth stage of Italian ryegrass. Yang *et al.* (2016b) also  
345 found that the interaction effect of nitrogen and potassium fertilization on soil  
346 potassium and nitrogen was not obvious in a cotton field.

#### 347 *Growth index*

348 To understand the growth of crops over time, it is necessary to determine their  
349 nutritional status. The traditional determination of leaf colour is to detect the  
350 chlorophyll content, which has high accuracy, but it takes considerable work and time  
351 (Croft *et al.*, 2017). Plant height, chlorophyll, leaf area and photosynthetic index are  
352 important parameters to characterize crop photosynthetic production capacity, crop  
353 growth and nutritional status (Lin *et al.*, 2019). The results showed that in comparison  
354 to the CRU treatment, the urea treatment significantly reduced the plant height, SPAD,  
355 leaf area and photosynthetic index, which might have led to plant senescence.

356 In addition, the application of KCl significantly increased the chlorophyll content  
357 in Italian ryegrass. Within a certain range of KCl applications, the chlorophyll content  
358 increased with increasing KCl applications, but beyond this threshold, the effect of  
359 KCl was weakened, thus affecting the ornamental value of Italian ryegrass. This

360 outcome may have been due to the decrease in assimilative capacity, enzyme content  
361 and enzyme activity caused by the lack or excess of potassium, further leading to the  
362 decrease in leaf area and photosynthesis and thus affecting photosynthesis (Lu *et al.*,  
363 2017). Generally, the CRU×KCl300 treatment improved the leaf photosynthesis of  
364 Italian ryegrass.

365       Roots play an important role in crop growth and yield formation (Bandeoğlu *et*  
366 *al.*, 2004). In the present study, the application of the CRU and moderate KCl rate  
367 significantly increased root length, surface areas and the numbers of tips and branches  
368 compared with other treatments, and there was a significant N×K interaction effect on  
369 the numbers of tips. These results suggested that suitable nitrogen and potassium  
370 fertilizer application can enhance root growth and thereby increase the uptake of  
371 nutrients (Enriquez-Hidalgo *et al.*, 2018). In total, there was no significant N×K  
372 interaction effect on the growth index. Dong *et al.* (2010) also found a positive  
373 correlation between the duration of reproductive growth and the appropriate amount  
374 of N or K application, but the interaction effect of N×K was not obvious.

#### 375 *Yield and fertilizer use efficiency*

376 Nitrogen and potassium are the key factors affecting the yield of Italian ryegrass.  
377 Under sufficient nitrogen, the leaves of Italian ryegrass are thick green and have  
378 strong growth and a high yield of fresh grass, and under nitrogen deficiency, the  
379 leaves of Italian ryegrass are yellow and have poor growth (Vleugels *et al.*, 2017).

380       The results showed that in comparison to those of the urea treatment and the  
381 control treatment, the fresh and dry yields of the CRU treatment were highest and  
382 increased by 20.5-53.2%. Studies have also shown that CRU effectively promotes the  
383 ability of photosynthesis to produce organic matter and then increase plant yield (Van  
384 Eerd *et al.*, 2017; Miyatake *et al.*, 2019). In this study, the second and third clipping  
385 stages were the period of high yield of Italian ryegrass and the period of high yield of  
386 CRU. This highlighted that the N uptake of Italian ryegrass in the first growing stages  
387 is lower, which can be functional to the presented pattern of N release in soil (Masoni  
388 *et al.*, 2015). In the present study, the yield of the CRU treatment was higher than that  
389 of the common urea treatment in the four clipping periods, especially in the middle

390 and later stages of Italian ryegrass growth, which occurred because the CRU slowly  
391 released nitrogen and met the growth demand of Italian ryegrass. In general, the  
392 nitrogen fertilizer type markedly affected the fresh and dry yield, but the application  
393 amount of potassium fertilizer had little effect on the yield. Moreover, no significant  
394 N×K interaction effect was found in the present study, which was different from Yang  
395 *et al.* (2016a). Hence, it is necessary and important to carry out further field  
396 experiments on the accurate rate and timing of N and K. Through a comparison, the  
397 yield of the CRU×KCl450 treatment was found to be the highest in the early stage,  
398 but considering the later stage yield, fertilizer utilization rate, economic benefits and  
399 other factors, the whole growth period of the CRU×KCl300 treatment was the most  
400 suitable treatment combination of all treatments, which improved the yield of Italian  
401 ryegrass.

402       There are many parameters to describe the efficiency of fertilizer utilization. The  
403 key to improving the efficiency of fertilizer utilization is nutrient absorption (Xue *et al.*  
404 *et al.*, 2017). In this study, NUE and KUE were used. Regardless of the amount of KCl  
405 applied, the NUE of the CRU treatment was significantly higher than that of the urea  
406 treatment, which might have been due to high nitrogen absorption, and Gaylord *et al.*  
407 (1975) also found similar results. In addition, the KCl rate had a significant effect on  
408 potassium absorption and KUE. The KUE values of the KCl300 treatment were  
409 higher than those of the KCl150 and KCl450 treatments. Therefore, the CRU×KCl300  
410 treatment could improve the NUE and KUE of Italian ryegrass. In the present study, at  
411 the same N rate, the inorganic nitrogen concentration in the soil of the CRU was  
412 higher than that in the urea treatments, which indicated that more N remained in the  
413 soil, thus reducing the N leaching loss. Masoni *et al.* 2015 also found that the increase  
414 in nutrient use efficiency could also minimize unfavourable effects on the  
415 environment, mainly leaching.

#### 416 **Conclusion**

417 The nitrogen fertilizer type and potassium fertilizer rate had significant effects on  
418 Italian ryegrass growth, yield and soil fertility, but there was no significant N×K  
419 interaction effect. The CRU released nitrogen slowly, which was consistent with the

420 nitrogen demand of Italian ryegrass during the whole growth and development period,  
421 simplifying the cultivation technology. This study found that the amount of potassium  
422 fertilizer had no significant effect on the growth of Italian ryegrass in the early stage,  
423 but in the middle and late stages of ryegrass growth, the CRU×KCl300 treatment  
424 improved plant SPAD and root morphology, delayed senescence of Italian ryegrass,  
425 and significantly increased the yield and fertilizer use efficiency. Hence, the  
426 CRU×KCl300 treatment is recommended as the best fertilization ratio for Italian  
427 ryegrass, and this recommendation can serve technical support for Italian ryegrass  
428 production and fertilization.

#### 429 **Conflict of Interest Statement**

430 Author Jianqiu Chen was employed by the company Kingenta Ecological Engineering  
431 Group Co., Ltd. The remaining authors declare that the research was conducted in the  
432 absence of any commercial or financial relationships that could be construed as a  
433 potential conflict of interest.

#### 434 **Acknowledgment**

435 The authors appreciate American Journal Experts (AJE) for English language editing.

#### 436 **Author contributions**

437 J.Q.C. and X.Y.Y. conceived and designed the experiments; Q.J.L. and X.Q.H.  
438 analyzed the data; J.B.G. and X.Y.Y. wrote the manuscript; S.T.L. and H.L. were  
439 involved in the related discussion; Y.L. helps to improve the quality of the manuscript.  
440 All authors reviewed the manuscript.

#### 441 **Funding**

442 The present study was supported by the Shandong Provincial Natural Science  
443 Foundation, China (ZR2018PD001), China Postdoctoral Science Foundation  
444 (2019M652428), Project of Introducing and Cultivating Young Talent in the  
445 Universities of Shandong Province (Soil Erosion Process and Ecological Regulation),  
446 and Natural Science Foundation of China (31500371/31700553).

#### **References**

**Alves dos Santos J, da Fonseca AF, Barth G, Zardo Filho R.** 2018. Silage maize

quality in different uses of Italian ryegrass and soil management methods after liming. *Arch. Agron. Soil Sci.* **64(2)**, 173-184.

**Ata-Ul-Karim ST, Liu X, Lu Z, Zheng H, Cao W, Zhu Y.** 2017. Estimation of nitrogen fertilizer requirement for rice crop using critical nitrogen dilution curve. *Field Crop Res.* **201**, 32-40.

**Bandeolu E, Eyidoan F, Yücel M, Avni ktem H.** 2004. Antioxidant responses of shoots and roots of lentil to nacl-salinity stress. *Plant Growth Regul.* **42(1)**, 69-77.

**Binder S, Isbell F, Polasky S, Catford JA, Tilman D.** 2018. Grassland biodiversity can pay. *P. Nalt. Acad. Sci. USA.* **115(15)**, 3876-3881.

**Bolinder MA, T. Kätterer, O. Andréén, Ericson L, Kirchmann H.** 2010. Long-term soil organic carbon and nitrogen dynamics in forage-based crop rotations in northern sweden (63-64°n). *Agr. Ecosyst. Environ.* **138(3-4)**, 335-342.

**Cavalli D, Cabassi G, Borrelli L, Geromel G, Bechini L, Degano L, Gallina PM.** 2016. Nitrogen fertilizer replacement value of undigested liquid cattle manure and digestates. *Eur. J. Agron.* **73**, 34-41.

**Chen J, Guo Z, Chen H, Yang X, Geng J.** 2020. Effects of different potassium fertilizer types and dosages on cotton yield, soil available potassium and leaf photosynthesis. *Arch. Agron. Soil Sci.* (just-accepted).

**Croft H, Chen JM, Luo X, Bartlett P, Chen B, Staebler RM.** 2017. Leaf chlorophyll content as a proxy for leaf photosynthetic capacity. *Global Change Biol.* **23(9)**, 3513-3524.

**Dong HZ, Kong XQ, Li WJ, Tang W, Zhang DM.** 2010. Effects of plant density and nitrogen and potassium fertilization on cotton yield and uptake of major



nutrients in two fields with varying fertility. *Field Crops Res.* **119** (1), 106-113.

**Enriquez-Hidalgo D, Gilliland TJ, Egan M, Hennessy D.** 2018. Production and quality benefits of white clover inclusion into ryegrass swards at different nitrogen fertilizer rates. *J. Agr. Sci.* 1-9.

**Fan X, Kawamura K, Xuan TD, Yuba N, Lim J, Yoshitoshi R, Obitsu T.** 2018. Low-cost visible and near-infrared camera on an unmanned aerial vehicle for assessing the herbage biomass and leaf area index in an Italian ryegrass field. *Grass. Sci.* **64**(2), 145-150.

**Gaylord MV.** 1975. Spotted response of overseeded ryegrass to sulfur-coated urea. *Agron. J.* **67**(6), 838-840.

**Geng JB, Ma Q, Chen JQ, Zhang M, Li CL, Yang YC, Yang XY, Liu ZG.** 2016. Effects of polymer coated urea and sulfur fertilization on yield, nitrogen use efficiency and leaf senescence of cotton. *Field Crop Res.* **187**, 87-95.

**Hasanuzzaman M, Bhuyan MHM, Nahar K, Hossain M, Mahmud JA, Hossen M, Fujita M.** 2018. Potassium: a vital regulator of plant responses and tolerance to abiotic stresses. *Agron.* **8**(3), 31.

**He HB, Li WX, Zhang YW, Cheng JK, Jia XY, Li S, Xin GR.** 2020. Effects of Italian ryegrass residues as green manure on soil properties and bacterial communities under an Italian ryegrass (*Lolium multiflorum* L.)-rice (*Oryza sativa* L.) rotation. *Soil Till Res.* **196**, 104487.

**Hussain F, Hussain I, Khan AHA, Muhammad YS, Iqbal M, Soja G, Yousaf S.** 2018. Combined application of biochar, compost, and bacterial consortia with Italian ryegrass enhanced phytoremediation of petroleum hydrocarbon contaminated soil. *Environ. Exp. Bot.* **153**, 80-88.

**Jiménez-Calderón JD, Martínez-Fernández A, Benaouda M, Vicente F.** 2018. A

winter intercrop of faba bean and rapeseed for silage as a substitute for Italian ryegrass in rotation with maize. *Arch. Agron. Soil Sci.* **64(7)**, 983-993.

**Lin KH, Wu CW, Chang YS.** 2019. Applying dickson quality index, chlorophyll fluorescence, and leaf area index for assessing plant quality of *Pentas lanceolata*. *Not. Bot. Horti Agrobi.* **47(1)**, 169-176.

**Jarvis SC.** 1987. The effects of low, regulated supplies of nitrate and ammonium nitrogen on the growth and composition of perennial ryegrass. *Plant Soil.* **100(1)**, 99-112.

**Kurbah I, Dixit SP.** 2019. Soil potassium fractions as influenced by integrated fertilizer application based on soil test crop response under maize-wheat cropping systems in Acid Alfisol. *Int. J. Econ. Plant.* **6(1)**, 25-29.

**Li P, Lu J, Wang Y, Wang S, Hussain S, Ren T, Li X.** 2018. Nitrogen losses, use efficiency, and productivity of early rice under controlled-release urea. *Agr. Ecosyst. Environ.* **251**, 78-87.

**Li J, Niu L, Zhang Q, Di H, Hao J.** 2017. Impacts of long-term lack of potassium fertilization on different forms of soil potassium and crop yields on the North China Plains. *J. Soil Sediment.* **17(6)**, 1607-1617.

**Liu J, Yang Y, Gao B, Li YC, Xie J.** 2019. Bio-based elastic polyurethane for controlled-release urea fertilizer: Fabrication, properties, swelling and nitrogen release characteristics. *J. Clean. Prod.* **209**, 528-537.

**Liu M, Dries L, Heijman W, Huang J, Zhu X, Hu Y, Chen H.** 2018. The impact of ecological construction programs on grassland conservation in Inner Mongolia, China. *Land Degrad. Dev.* **29(2)**, 326-336.

**Lu Z, Pan Y, Hu W, Cong R, Ren T, Guo S, Lu J.** 2017. The photosynthetic and structural differences between leaves and siliques of *Brassica napus* exposed to

potassium deficiency. *BMC Plant Biol.* **17(1)**, 240.

**Martin K, Edwards G, Bryant R, Hodge M, Moir J, Chapman D, Cameron K.**

2017. Herbage dry-matter yield and nitrogen concentration of grass, legume and herb species grown at different nitrogen-fertiliser rates under irrigation. *Anim. Prod. Sci.* **57(7)**, 1283-1288.

**Masoni A, Mariotti M, Ercoli L, Pampana S, Arduini I. 2015.** Nitrate leaching

from forage legume crops and residual effect on italian ryegrass. *Agrochimica Pisa.* **59(1)**, 75-91.

**McDonnell RP, Staines MV, Bolland MDA.** 2018. Determining the critical plant test

potassium concentration for annual and Italian ryegrass on dairy pastures in south-western Australia. *Grass Forage Sci.* **73(1)**, 112-122.

**Miyatake M, Ohyama T, Yokoyama T, Sugihara S, Motobayashi T, Kamiya T,**

**Ohkama-Ohtsu N.** (2019). Effects of deep placement of controlled-release nitrogen fertilizer on soybean growth and yield under sulfur deficiency. *Soil Sci. Plant Nutr.* **65(3)**, 259-266.

**Oliveira EMD, Oliveira Filho JDC, Oliveira RAD, Oliveira RMD, Cecon PR.**

2017. Determination of xaraés grass quality submitted to irrigation water levels and nitrogen and potassium doses. *Eng. Agr-Jaboticabal.* **7(1)**, 64-74.

**Rietra RP, Heinen M, Dimkpa CO, Bindraban PS. 2017.** Effects of nutrient

antagonism and synergism on yield and fertilizer use efficiency. *Commun. Soil Sci. Plan.* **48(16)**, 1895-1920.

**Soil Survey Staff.** 1999. Soil taxonomy. In: Soil Survey Staff (Ed.), a basic system of

soil classification for making and interpreting Soil Surveys, 2nd U.S. Gov. Print. Office, Washington, DC. pp. 163-167.

**Svatos KB, Abbott LK.** 2019. Dairy soil bacterial responses to nitrogen application

in simulated Italian ryegrass and white clover pasture. *J. Dairy Sci.* **102**(10), 9495-9504.

**Snyder GH, Cisar JL.** 2000. Nitrogen/potassium fertilization ratios for bermudagrass turf. *Crop Sci.* **40**(6), 1719-1723.

**Tang Q, Feng M.** 2002. *Practical Statistics and DPS Data Processing System*. China Agric. Press. Beijing.

**Van Eerd LL, Turnbull JJD, Bakker CJ, Vyn RJ, McKeown AW, Westerveld SM.** 2017. Comparing soluble to controlled-release nitrogen fertilizers: storage cabbage yield, profit margins, and N use efficiency. *Can. J. Plant Sci.* **98**(4), 815-829.

**Vleugels T, Rijckaert G, Gislum R.** 2017. Seed yield response to N fertilization and potential of proximal sensing in Italian ryegrass seed crops. *Field Crop Res.* **211**, 37-47.

**Wang H, Wu L, Cheng M, Fan J, Zhang F, Zou Y, Wang X.** 2018. Coupling effects of water and fertilizer on yield, water and fertilizer use efficiency of drip-fertigated cotton in northern Xinjiang, China. *Field Crop Res.* **219**, 169-179.

**Woods RR, Cameron KC, Edwards GR, Di HJ, Clough TJ.** 2018. Reducing nitrogen leaching losses in grazed dairy systems using an Italian ryegrass-plantain-white clover forage mix. *Grass Forage Sci.* **73**(4), 878-887.

**Xue X, Mai W, Zhao Z, Zhang K, Tian C.** 2017. Optimized nitrogen fertilizer application enhances absorption of soil nitrogen and yield of castor with drip irrigation under mulch film. *Ind. Crop Prod.* **95**, 156-162.

**Yang XY, Geng JB, Li CL, Zhang M, Chen BC, Tian XF, Zheng WK, Liu ZG, Wang C.** 2016a. Combined application of polymer coated potassium chloride and urea improved fertilizer use efficiencies, yield and leaf photosynthesis of

cotton on saline soil. *Field Crops Res.* **197**, 63-73.

**Yang XY, Geng JB, Li CL, Zhang M, Tian XF.** 2016b. Cumulative release characteristics of controlled-release nitrogen and potassium fertilizers and their effects on soil fertility, and cotton growth. *Sci. Rep.* **6**, 39030.

**Yang XY, Li CL, Zhang Q, Liu ZG, Geng JB, Zhang M.** 2017. Effects of polymer-coated potassium chloride on cotton yield, leaf senescence and soil potassium. *Field Crops Res.* **212**, 145-152.

**Zheng W, Sui C, Liu Z, Geng J, Tian X, Yang X, Zhang M.** 2016. Long-term effects of controlled-release urea on crop yields and soil fertility under wheat–corn double cropping systems. *Agron. J.* **108(4)**, 1703-1716.

### Figure Legends

Fig. 1 Release of nitrogen from CRU.

Fig. 2 Change of the soil  $\text{NO}_3^-$ -N and  $\text{NH}_4^+$ -N contents.

Fig. 3 Change of soil available K, water soluble K, exchangeable K and non-exchangeable K contents.

**Table 1 Part properties of tested soil before Italian ryegrass planting in 2019.**

| pH value (2.5:1) | Organic matter ( $\text{g kg}^{-1}$ ) | Total N ( $\text{g kg}^{-1}$ ) | $\text{NO}_3^-$ -N ( $\text{mg kg}^{-1}$ ) | $\text{NH}_4^+$ -N ( $\text{mg kg}^{-1}$ ) | Available P ( $\text{mg kg}^{-1}$ ) | Available K ( $\text{mg kg}^{-1}$ ) |
|------------------|---------------------------------------|--------------------------------|--------------------------------------------|--------------------------------------------|-------------------------------------|-------------------------------------|
| 6.52             | 6.88                                  | 0.73                           | 46.09                                      | 31.22                                      | 39.82                               | 182.08                              |

**Table 2 The plant height of Italian ryegrass under different treatments.**

| Treatment                                                         | First clipping (cm) | Second clipping (cm) | Third clipping (cm) | Fourth clipping (cm) |
|-------------------------------------------------------------------|---------------------|----------------------|---------------------|----------------------|
| <b>Nitrogen fertilizer type</b>                                   |                     |                      |                     |                      |
| CRU                                                               | 17.64 a             | 25.22 a              | 24.47 a             | 15.50 a              |
| Urea                                                              | 16.67 a             | 23.94 a              | 19.83 b             | 8.06 b               |
| <b>Potassium fertilizer rate (<math>\text{kg ha}^{-1}</math>)</b> |                     |                      |                     |                      |
| 150                                                               | 17.78 a             | 23.47 a              | 22.70 a             | 11.17 b              |

|                           |                |                  |                 |                   |
|---------------------------|----------------|------------------|-----------------|-------------------|
| <b>300</b>                | <b>16.48 a</b> | <b>25.17 a</b>   | <b>21.62 a</b>  | <b>13.08 a</b>    |
| <b>450</b>                | <b>17.20 a</b> | <b>25.12 a</b>   | <b>20.63 a</b>  | <b>11.08 b</b>    |
| <b>N×K interaction</b>    |                |                  |                 |                   |
| <b>Control</b>            | <b>16.27 a</b> | <b>21.43 c</b>   | <b>20.30 b</b>  | <b>8.32 b</b>     |
| <b>CRU×KCl150</b>         | <b>17.83 a</b> | <b>24.57 abc</b> | <b>25.23 a</b>  | <b>14.33 a</b>    |
| <b>CRU×KCl300</b>         | <b>16.77 a</b> | <b>25.90 a</b>   | <b>23.23 ab</b> | <b>17.02 a</b>    |
| <b>CRU×KCl450</b>         | <b>18.33 a</b> | <b>25.20 ab</b>  | <b>21.93 ab</b> | <b>15.16 a</b>    |
| <b>Urea×KCl150</b>        | <b>17.73 a</b> | <b>22.36 bc</b>  | <b>20.17 b</b>  | <b>8.32 b</b>     |
| <b>Urea×KCl300</b>        | <b>16.20 a</b> | <b>24.43 abc</b> | <b>20.00 b</b>  | <b>9.16 b</b>     |
| <b>Urea×KCl450</b>        | <b>16.07 a</b> | <b>25.03 ab</b>  | <b>19.33 b</b>  | <b>7.03 b</b>     |
| <b>Source of variance</b> |                |                  |                 |                   |
| <b>N</b>                  | <b>0.1619</b>  | <b>0.1735</b>    | <b>0.0023</b>   | <b>&lt;0.0001</b> |
| <b>K</b>                  | <b>0.3002</b>  | <b>0.2415</b>    | <b>0.1858</b>   | <b>0.0632</b>     |
| <b>N×K</b>                | <b>0.3855</b>  | <b>0.6337</b>    | <b>0.4809</b>   | <b>0.5067</b>     |

Note: Means followed by different lowercase letters in the same column were significantly different based on analyses with ANOVAs followed by Duncan tests ( $P < 0.05$ ).

Control: no nitrogen and potassium fertilizer, CRU: polymer-coated urea, KCl: potassium chloride.

Table 3 The leaf area of Italian ryegrass under different treatments.

| <b>Treatment</b>                                      | <b>First clipping<br/>(mm<sup>2</sup>)</b> | <b>Second clipping<br/>(mm<sup>2</sup>)</b> | <b>Third clipping<br/>(mm<sup>2</sup>)</b> | <b>Fourth clipping<br/>(mm<sup>2</sup>)</b> |
|-------------------------------------------------------|--------------------------------------------|---------------------------------------------|--------------------------------------------|---------------------------------------------|
| <b>Nitrogen fertilizer type</b>                       |                                            |                                             |                                            |                                             |
| <b>CRU</b>                                            | <b>295.72 a</b>                            | <b>542.99 a</b>                             | <b>475.30 a</b>                            | <b>171.64 a</b>                             |
| <b>Urea</b>                                           | <b>282.67 a</b>                            | <b>614.73 a</b>                             | <b>389.57 b</b>                            | <b>57.16 b</b>                              |
| <b>Potassium fertilizer rate (kg ha<sup>-1</sup>)</b> |                                            |                                             |                                            |                                             |
| <b>150</b>                                            | <b>287.10 a</b>                            | <b>522.52 a</b>                             | <b>396.50 a</b>                            | <b>111.93 a</b>                             |
| <b>300</b>                                            | <b>286.22 a</b>                            | <b>593.90 a</b>                             | <b>418.97 a</b>                            | <b>135.10 a</b>                             |
| <b>450</b>                                            | <b>294.27 a</b>                            | <b>620.17 a</b>                             | <b>481.83 a</b>                            | <b>96.17 b</b>                              |
| <b>N×K interaction</b>                                |                                            |                                             |                                            |                                             |
| <b>Control</b>                                        | <b>328.73 a</b>                            | <b>491.52 a</b>                             | <b>330.53 b</b>                            | <b>108.32 b</b>                             |
| <b>CRU×KCl150</b>                                     | <b>289.40 a</b>                            | <b>417.61 a</b>                             | <b>381.93 b</b>                            | <b>167.86 a</b>                             |
| <b>CRU×KCl300</b>                                     | <b>305.87 a</b>                            | <b>589.44 a</b>                             | <b>455.47 ab</b>                           | <b>184.50 a</b>                             |
| <b>CRU×KCl450</b>                                     | <b>291.92 a</b>                            | <b>622.02 a</b>                             | <b>588.53 a</b>                            | <b>162.63 a</b>                             |
| <b>Urea×KCl150</b>                                    | <b>284.85 a</b>                            | <b>627.56 a</b>                             | <b>411.12 b</b>                            | <b>56.07 cd</b>                             |
| <b>Urea×KCl300</b>                                    | <b>266.57 a</b>                            | <b>598.41 a</b>                             | <b>382.47 b</b>                            | <b>85.73 bc</b>                             |
| <b>Urea×KCl450</b>                                    | <b>296.63 a</b>                            | <b>618.39 a</b>                             | <b>375.13 b</b>                            | <b>29.76 d</b>                              |
| <b>Source of variance</b>                             |                                            |                                             |                                            |                                             |
| <b>N</b>                                              | <b>0.6001</b>                              | <b>0.3835</b>                               | <b>0.0319</b>                              | <b>&lt;0.0001</b>                           |
| <b>K</b>                                              | <b>0.9588</b>                              | <b>0.5909</b>                               | <b>0.1536</b>                              | <b>0.0621</b>                               |

|            |               |               |               |               |
|------------|---------------|---------------|---------------|---------------|
| <b>N×K</b> | <b>0.7394</b> | <b>0.4862</b> | <b>0.0484</b> | <b>0.4916</b> |
|------------|---------------|---------------|---------------|---------------|

**Note: Means followed by different lowercase letters in the same column were significantly different based on analyses with ANOVAs followed by Duncan tests ( $P < 0.05$ ).**

**Control: no nitrogen and potassium fertilizer, CRU: polymer-coated urea, KCl: potassium chloride.**

**Table 4 The leaf SPAD value of Italian ryegrass under different treatments.**

| <b>Treatment</b>                                      | <b>First clipping</b> | <b>Second clipping</b> | <b>Third clipping</b> | <b>Fourth clipping</b> |
|-------------------------------------------------------|-----------------------|------------------------|-----------------------|------------------------|
| <b>Nitrogen fertilizer type</b>                       |                       |                        |                       |                        |
| CRU                                                   | 49.76 a               | 54.70 a                | 27.49 a               | 17.44 a                |
| Urea                                                  | 44.37 b               | 57.66 b                | 20.92 b               | 10.39 b                |
| <b>Potassium fertilizer rate (kg ha<sup>-1</sup>)</b> |                       |                        |                       |                        |
| 150                                                   | 45.72 b               | 54.83 a                | 24.17 a               | 14.33 a                |
| 300                                                   | 46.47 ab              | 57.73 a                | 25.97 a               | 15.02 a                |
| 450                                                   | 49.00 a               | 55.97 a                | 22.48 a               | 12.40 a                |
| <b>N×K interaction</b>                                |                       |                        |                       |                        |
| Control                                               | 45.67 c               | 50.93 c                | 25.97 ab              | 13.66 b                |
| CRU×KCl150                                            | 50.00 ab              | 51.66 c                | 27.56 ab              | 14.86 ab               |
| CRU×KCl300                                            | 47.66 bc              | 59.62 a                | 29.70 a               | 22.43 a                |
| CRU×KCl450                                            | 51.60 a               | 52.74 bc               | 25.20 ab              | 15.03 ab               |
| Urea×KCl150                                           | 41.43 d               | 58.02 ab               | 20.76 ab              | 13.80 b                |
| Urea×KCl300                                           | 45.27 c               | 55.80 abc              | 22.23 ab              | 7.60 b                 |
| Urea×KCl450                                           | 46.40 bc              | 59.16 a                | 19.76 b               | 9.77 b                 |
| <b>Source of variance</b>                             |                       |                        |                       |                        |
| N                                                     | 0.0008                | 0.0956                 | 0.002                 | 0.0047                 |
| K                                                     | 0.0746                | 0.3603                 | 0.2125                | 0.507                  |
| N×K                                                   | 0.1102                | 0.0436                 | 0.8487                | 0.039                  |

**Note: Means followed by different lowercase letters in the same column were significantly different based on analyses with ANOVAs followed by Duncan tests ( $P < 0.05$ ).**

**Control: no nitrogen and potassium fertilizer, CRU: polymer-coated urea, KCl: potassium chloride.**

**Table 5 The leaf photosynthesis chlorophyll parameters of Italian ryegrass under different treatments at the second clipping stage.**

|                                 | $P_n$                                    | $G_s$                        | $T_r$                                    | $C_i$                                    |
|---------------------------------|------------------------------------------|------------------------------|------------------------------------------|------------------------------------------|
| <b>Treatment</b>                | ( $\mu\text{mol m}^{-2} \text{s}^{-1}$ ) | ( $\mu\text{mol mol}^{-1}$ ) | ( $\mu\text{mol m}^{-2} \text{s}^{-1}$ ) | ( $\mu\text{mol m}^{-2} \text{s}^{-1}$ ) |
| <b>Nitrogen fertilizer type</b> |                                          |                              |                                          |                                          |

|                                                       |          |          |           |          |
|-------------------------------------------------------|----------|----------|-----------|----------|
| CRU                                                   | 295.72 a | 542.99 a | 475.30 a  | 171.64 a |
| Urea                                                  | 282.67 a | 614.73 a | 389.57 b  | 57.16 b  |
| <b>Potassium fertilizer rate (kg ha<sup>-1</sup>)</b> |          |          |           |          |
| 150                                                   | 287.10 a | 522.52 a | 396.50 a  | 111.93 a |
| 300                                                   | 286.22 a | 593.90 a | 418.97 a  | 135.10 a |
| 450                                                   | 294.27 a | 620.17 a | 481.83 a  | 96.17 b  |
| <b>N×K interaction</b>                                |          |          |           |          |
| Control                                               | 328.73 a | 491.52 a | 330.53 b  | 108.32 b |
| CRU×KCl150                                            | 289.40 a | 417.61 a | 381.93 b  | 167.86 a |
| CRU×KCl300                                            | 305.87 a | 589.44 a | 455.47 ab | 184.50 a |
| CRU×KCl450                                            | 291.92 a | 622.02 a | 588.53 a  | 162.63 a |
| Urea×KCl150                                           | 284.85 a | 627.56 a | 411.12 b  | 56.07 cd |
| Urea×KCl300                                           | 266.57 a | 598.41 a | 382.47 b  | 85.73 bc |
| Urea×KCl450                                           | 296.63 a | 618.39 a | 375.13 b  | 29.76 d  |
| <b>Source of variance</b>                             |          |          |           |          |
| N                                                     | 0.6001   | 0.3835   | 0.0319    | <0.0001  |
| K                                                     | 0.9588   | 0.5909   | 0.1536    | 0.0621   |
| N×K                                                   | 0.7394   | 0.4862   | 0.0484    | 0.4916   |

Note: Means followed by different lowercase letters in the same column were significantly different based on analyses with ANOVAs followed by Duncan tests ( $P < 0.05$ ).

Control: no nitrogen and potassium fertilizer, CRU: polymer-coated urea, KCl: potassium chloride,  $P_n$ : photosynthetic parameters including net photosynthetic rate,  $G_s$ : stomatal conductance,  $C_i$ : intercellular carbon dioxide concentration,  $T_r$ : transpiration rate.

Table 6 The root morphology of Italian ryegrass under different treatments at the fourth clipping stage.

| Treatments                                            | Total length (cm) | Surface area (cm <sup>2</sup> ) | Average diameter (mm) | Root volume (cm <sup>3</sup> ) | Tips        | Branches   |
|-------------------------------------------------------|-------------------|---------------------------------|-----------------------|--------------------------------|-------------|------------|
| <b>Nitrogen fertilizer type</b>                       |                   |                                 |                       |                                |             |            |
| CRU                                                   | 1480.89 a         | 180.23 a                        | 0.35 a                | 1.61 a                         | 14956.12 a  | 16076.37 a |
| Urea                                                  | 1377.67 b         | 159.56 b                        | 0.32 b                | 1.49 b                         | 13947.33 b  | 14872.35 b |
| <b>Potassium fertilizer rate (kg ha<sup>-1</sup>)</b> |                   |                                 |                       |                                |             |            |
| 150                                                   | 1393.00 c         | 164.50 b                        | 0.32 b                | 1.51 c                         | 14113.50 c  | 14989.31 c |
| 300                                                   | 1479.67 a         | 176.17 a                        | 0.35 a                | 1.60 a                         | 14754.17 a  | 15905.04 a |
| 450                                                   | 1415.16 b         | 168.67 b                        | 0.33 b                | 1.55 b                         | 14487.33 b  | 15528.78 b |
| <b>N×K interaction</b>                                |                   |                                 |                       |                                |             |            |
| Control                                               | 1229.67 e         | 75.33 e                         | 0.23 c                | 0.90 d                         | 8142.02 e   | 10214.56 e |
| CRU×KCl150                                            | 1434.09 bc        | 173.66 b                        | 0.33 b                | 1.56 bc                        | 14521.72 bc | 15490.34 c |
| CRU×KCl300                                            | 1545.33 a         | 188.45 a                        | 0.36 a                | 1.67 a                         | 15411.23 a  | 16699.76 a |



|                           |           |           |         |         |             |            |
|---------------------------|-----------|-----------|---------|---------|-------------|------------|
| CRU×KCl450                | 1463.73 b | 178.76 b  | 0.34 ab | 1.61 ab | 14935.33 ab | 16039.72 b |
| Urea×KCl150               | 1352.01 d | 155.33 d  | 0.31 b  | 1.46 c  | 13705.49 d  | 14488.36 d |
| Urea×KCl300               | 1414.21 c | 164.98 c  | 0.34 ab | 1.52 bc | 14097.34 cd | 15111.23 c |
| Urea×KCl450               | 1367.03 d | 159.35 cd | 0.32 b  | 1.49 c  | 14039.76 cd | 15017.74 c |
| <b>Source of variance</b> |           |           |         |         |             |            |
| N                         | <0.0001   | <0.0001   | 0.0111  | <0.0001 | <0.0001     | <0.0001    |
| K                         | <0.0001   | 0.0013    | 0.0197  | 0.0003  | 0.0002      | 0.0004     |
| N×K                       | 0.063     | 0.3063    | 0.9734  | 0.1898  | 0.0321      | 0.0937     |

Note: Means followed by different lowercase letters in the same column were significantly different based on analyses with ANOVAs followed by Duncan tests ( $P < 0.05$ ).

Table 7 The fresh yield of Italian ryegrass under different treatments.

| Treatment                                             | First clipping<br>(g plant <sup>-1</sup> ) | Second clipping<br>(g plant <sup>-1</sup> ) | Third clipping<br>(g plant <sup>-1</sup> ) | Fourth clipping<br>(g plant <sup>-1</sup> ) | Sum<br>(g plant <sup>-1</sup> ) |
|-------------------------------------------------------|--------------------------------------------|---------------------------------------------|--------------------------------------------|---------------------------------------------|---------------------------------|
| <b>Nitrogen fertilizer type</b>                       |                                            |                                             |                                            |                                             |                                 |
| CRU                                                   | 3.35 a                                     | 7.01 a                                      | 8.18 a                                     | 3.64 a                                      | 22.48 a                         |
| Urea                                                  | 2.98 b                                     | 6.48 a                                      | 7.54 b                                     | 2.56 b                                      | 19.56 b                         |
| <b>Potassium fertilizer rate (kg ha<sup>-1</sup>)</b> |                                            |                                             |                                            |                                             |                                 |
| 150                                                   | 3.29 a                                     | 6.42 a                                      | 8.29 a                                     | 3.19 a                                      | 21.19 a                         |
| 300                                                   | 3.10 a                                     | 6.95 a                                      | 7.46 b                                     | 3.35 a                                      | 20.86 a                         |
| 450                                                   | 3.11 a                                     | 6.86 a                                      | 7.84 ab                                    | 2.76 b                                      | 21.01 a                         |
| <b>N×K interaction</b>                                |                                            |                                             |                                            |                                             |                                 |
| Control                                               | 3.08 bc                                    | 5.49 c                                      | 5.51 d                                     | 2.44 b                                      | 16.52 c                         |
| CRU×KCl150                                            | 3.36 a                                     | 6.84 ab                                     | 8.58 a                                     | 3.66 a                                      | 22.45 a                         |
| CRU×KCl300                                            | 3.32 ab                                    | 7.18 a                                      | 7.56 bc                                    | 4.21 a                                      | 22.28 a                         |
| CRU×KCl450                                            | 3.38 a                                     | 6.99 ab                                     | 8.42 ab                                    | 3.06 b                                      | 22.72 a                         |
| Urea×KCl150                                           | 3.22 ab                                    | 5.99 bc                                     | 8.00 abc                                   | 2.72 b                                      | 19.93 b                         |
| Urea×KCl300                                           | 2.88 c                                     | 6.71 ab                                     | 7.36 c                                     | 2.49 b                                      | 19.44 b                         |
| Urea×KCl450                                           | 2.84 c                                     | 6.73 ab                                     | 7.27 c                                     | 2.46 b                                      | 19.30 b                         |
| <b>Source of variance</b>                             |                                            |                                             |                                            |                                             |                                 |
| N                                                     | 0.0009                                     | 0.0663                                      | 0.0326                                     | <0.0001                                     | 0.0003                          |
| K                                                     | 0.1024                                     | 0.2379                                      | 0.1622                                     | 0.0215                                      | 0.8638                          |
| N×K                                                   | 0.1235                                     | 0.6313                                      | 0.1577                                     | 0.0307                                      | 0.7555                          |

Note: Means followed by different lowercase letters in the same column were significantly different based on analyses with ANOVAs followed by Duncan tests ( $P < 0.05$ ).

Control: no nitrogen and potassium fertilizer, CRU: polymer-coated urea, KCl: potassium chloride.

Table 8 The dry yield of Italian ryegrass under different treatments.

| Treatment                                             | First clipping<br>(g plant <sup>-1</sup> ) | Second clipping<br>(g plant <sup>-1</sup> ) | Third clipping<br>(g plant <sup>-1</sup> ) | Fourth clipping<br>(g plant <sup>-1</sup> ) | Sum<br>(g plant <sup>-1</sup> ) |
|-------------------------------------------------------|--------------------------------------------|---------------------------------------------|--------------------------------------------|---------------------------------------------|---------------------------------|
| <b>Nitrogen fertilizer type</b>                       |                                            |                                             |                                            |                                             |                                 |
| CRU                                                   | 1.03 a                                     | 1.74 a                                      | 1.91 a                                     | 1.01 a                                      | 5.68 a                          |
| Urea                                                  | 0.94 b                                     | 1.57 a                                      | 1.61 b                                     | 0.72 b                                      | 4.85 b                          |
| <b>Potassium fertilizer rate (kg ha<sup>-1</sup>)</b> |                                            |                                             |                                            |                                             |                                 |
| 150                                                   | 1.03 a                                     | 1.74 a                                      | 1.91 a                                     | 1.01 a                                      | 5.68 a                          |
| 300                                                   | 0.94 b                                     | 1.57 a                                      | 1.61 b                                     | 0.72 b                                      | 4.85 b                          |
| 450                                                   | 1.03 a                                     | 1.74 a                                      | 1.91 a                                     | 1.01 a                                      | 5.68 a                          |
| <b>N×K interaction</b>                                |                                            |                                             |                                            |                                             |                                 |
| Control                                               | 0.98 ab                                    | 1.44 ab                                     | 1.34 c                                     | 0.62 c                                      | 4.38 d                          |
| CRU×KCl150                                            | 1.02 a                                     | 1.71 a                                      | 1.95 a                                     | 0.92 b                                      | 5.61 ab                         |
| CRU×KCl300                                            | 1.02 a                                     | 1.75 a                                      | 1.79 ab                                    | 1.19 a                                      | 5.75 a                          |
| CRU×KCl450                                            | 1.03 a                                     | 1.75 a                                      | 1.98 a                                     | 0.92 b                                      | 5.68 ab                         |
| Urea×KCl150                                           | 0.95 b                                     | 1.34 b                                      | 1.71 abc                                   | 0.60 c                                      | 4.59 cd                         |
| Urea×KCl300                                           | 0.93 b                                     | 1.66 ab                                     | 1.67 abc                                   | 0.79 bc                                     | 5.06 bc                         |
| Urea×KCl450                                           | 0.96 ab                                    | 1.70 a                                      | 1.45 bc                                    | 0.78 bc                                     | 4.88 cd                         |
| <b>Source of variance</b>                             |                                            |                                             |                                            |                                             |                                 |
| N                                                     | 0.0018                                     | 0.0868                                      | 0.0171                                     | 0.001                                       | 0.0013                          |
| K                                                     | 0.8091                                     | 0.1773                                      | 0.6016                                     | 0.0313                                      | 0.3924                          |
| N×K                                                   | 0.9421                                     | 0.2891                                      | 0.263                                      | 0.2286                                      | 0.7365                          |

Note: Means followed by different lowercase letters in the same column were significantly different based on analyses with ANOVAs followed by Duncan tests ( $P < 0.05$ ).

Control: no nitrogen and potassium fertilizer, CRU: polymer-coated urea, KCl: potassium chloride.

**Table 9** The nitrogen uptake, potassium uptake, nitrogen use efficiency (NUE) and potassium use efficiency (KUE) of Italian ryegrass under different treatments.

| Treatment                                             | N uptake<br>(kg ha <sup>-1</sup> ) | K uptake<br>(kg ha <sup>-1</sup> ) | NUE<br>(%) | KUE<br>(%) |
|-------------------------------------------------------|------------------------------------|------------------------------------|------------|------------|
| <b>Nitrogen fertilizer type</b>                       |                                    |                                    |            |            |
| CRU                                                   | 313.56 a                           | 298.78 a                           | 38.37 a    | 31.77 a    |
| Urea                                                  | 298.78 b                           | 297.22 a                           | 33.45 b    | 30.46 a    |
| <b>Potassium fertilizer rate (kg ha<sup>-1</sup>)</b> |                                    |                                    |            |            |
| 150                                                   | 305.50 a                           | 270.67 c                           | 35.82 a    | 33.58 a    |
| 300                                                   | 308.01 a                           | 304.00 b                           | 36.05 a    | 34.79 a    |
| 450                                                   | 305.32 a                           | 319.33 a                           | 35.86 a    | 24.98 b    |
| <b>N×K interaction</b>                                |                                    |                                    |            |            |
| Control                                               | 202.33 c                           | 212.61 d                           | -          | -          |

|                           |                   |                   |                   |                |
|---------------------------|-------------------|-------------------|-------------------|----------------|
| <b>CRU×KCl150</b>         | <b>312.00 a</b>   | <b>270.04 c</b>   | <b>38.15 b</b>    | <b>33.69 a</b> |
| <b>CRU×KCl300</b>         | <b>315.67 a</b>   | <b>306.33 ab</b>  | <b>38.59 a</b>    | <b>36.59 a</b> |
| <b>CRU×KCl450</b>         | <b>313.22 b</b>   | <b>320.09 a</b>   | <b>38.36 ab</b>   | <b>25.03 b</b> |
| <b>Urea×KCl150</b>        | <b>299.12 b</b>   | <b>271.33 c</b>   | <b>33.49 c</b>    | <b>33.46 a</b> |
| <b>Urea×KCl300</b>        | <b>300.36 b</b>   | <b>301.67 b</b>   | <b>33.50 c</b>    | <b>32.99 a</b> |
| <b>Urea×KCl450</b>        | <b>297.11 b</b>   | <b>318.64 a</b>   | <b>33.35 c</b>    | <b>24.93 b</b> |
| <b>Source of variance</b> |                   |                   |                   |                |
| <b>N</b>                  | <b>&lt;0.0001</b> | <b>0.6245</b>     | <b>&lt;0.0001</b> | <b>0.2911</b>  |
| <b>K</b>                  | <b>0.2975</b>     | <b>&lt;0.0001</b> | <b>0.1275</b>     | <b>0.0002</b>  |
| <b>N×K</b>                | <b>0.7215</b>     | <b>0.7333</b>     | <b>0.1572</b>     | <b>0.417</b>   |

**Note: Means followed by different lowercase letters in the same column were significantly different based on analyses with ANOVAs followed by Duncan tests ( $P < 0.05$ ).**

**Control: no nitrogen and potassium fertilizer, CRU: polymer-coated urea, KCl: potassium chloride.**

**Table 10. Correlations between different forms of soil potassium and nitrogen**

| <b>Correlation coefficient</b>      | <b>Available K</b> | <b>Water soluble K</b> | <b>Exchangeable K</b> | <b>Non-exchangeable K</b> | <b>NO<sub>3</sub><sup>-</sup>-N</b> | <b>NH<sub>4</sub><sup>+</sup>-N</b> |
|-------------------------------------|--------------------|------------------------|-----------------------|---------------------------|-------------------------------------|-------------------------------------|
| <b>Available K</b>                  | <b>1</b>           |                        |                       |                           |                                     |                                     |
| <b>Water soluble K</b>              | <b>0.8733**</b>    | <b>1</b>               |                       |                           |                                     |                                     |
| <b>Exchangeable K</b>               | <b>0.6775**</b>    | <b>0.2333*</b>         | <b>1</b>              |                           |                                     |                                     |
| <b>Non-exchangeable K</b>           | <b>0.8455**</b>    | <b>0.8248**</b>        | <b>0.4423**</b>       | <b>1</b>                  |                                     |                                     |
| <b>NO<sub>3</sub><sup>-</sup>-N</b> | <b>0.7592**</b>    | <b>0.8370**</b>        | <b>0.2516*</b>        | <b>0.5092**</b>           | <b>1</b>                            |                                     |
| <b>NH<sub>4</sub><sup>+</sup>-N</b> | <b>0.7919**</b>    | <b>0.7695**</b>        | <b>0.4189**</b>       | <b>0.5579**</b>           | <b>0.8917**</b>                     | <b>1</b>                            |

**Note: \*  $P < 0.05$ ; \*\*  $P < 0.01$ .**

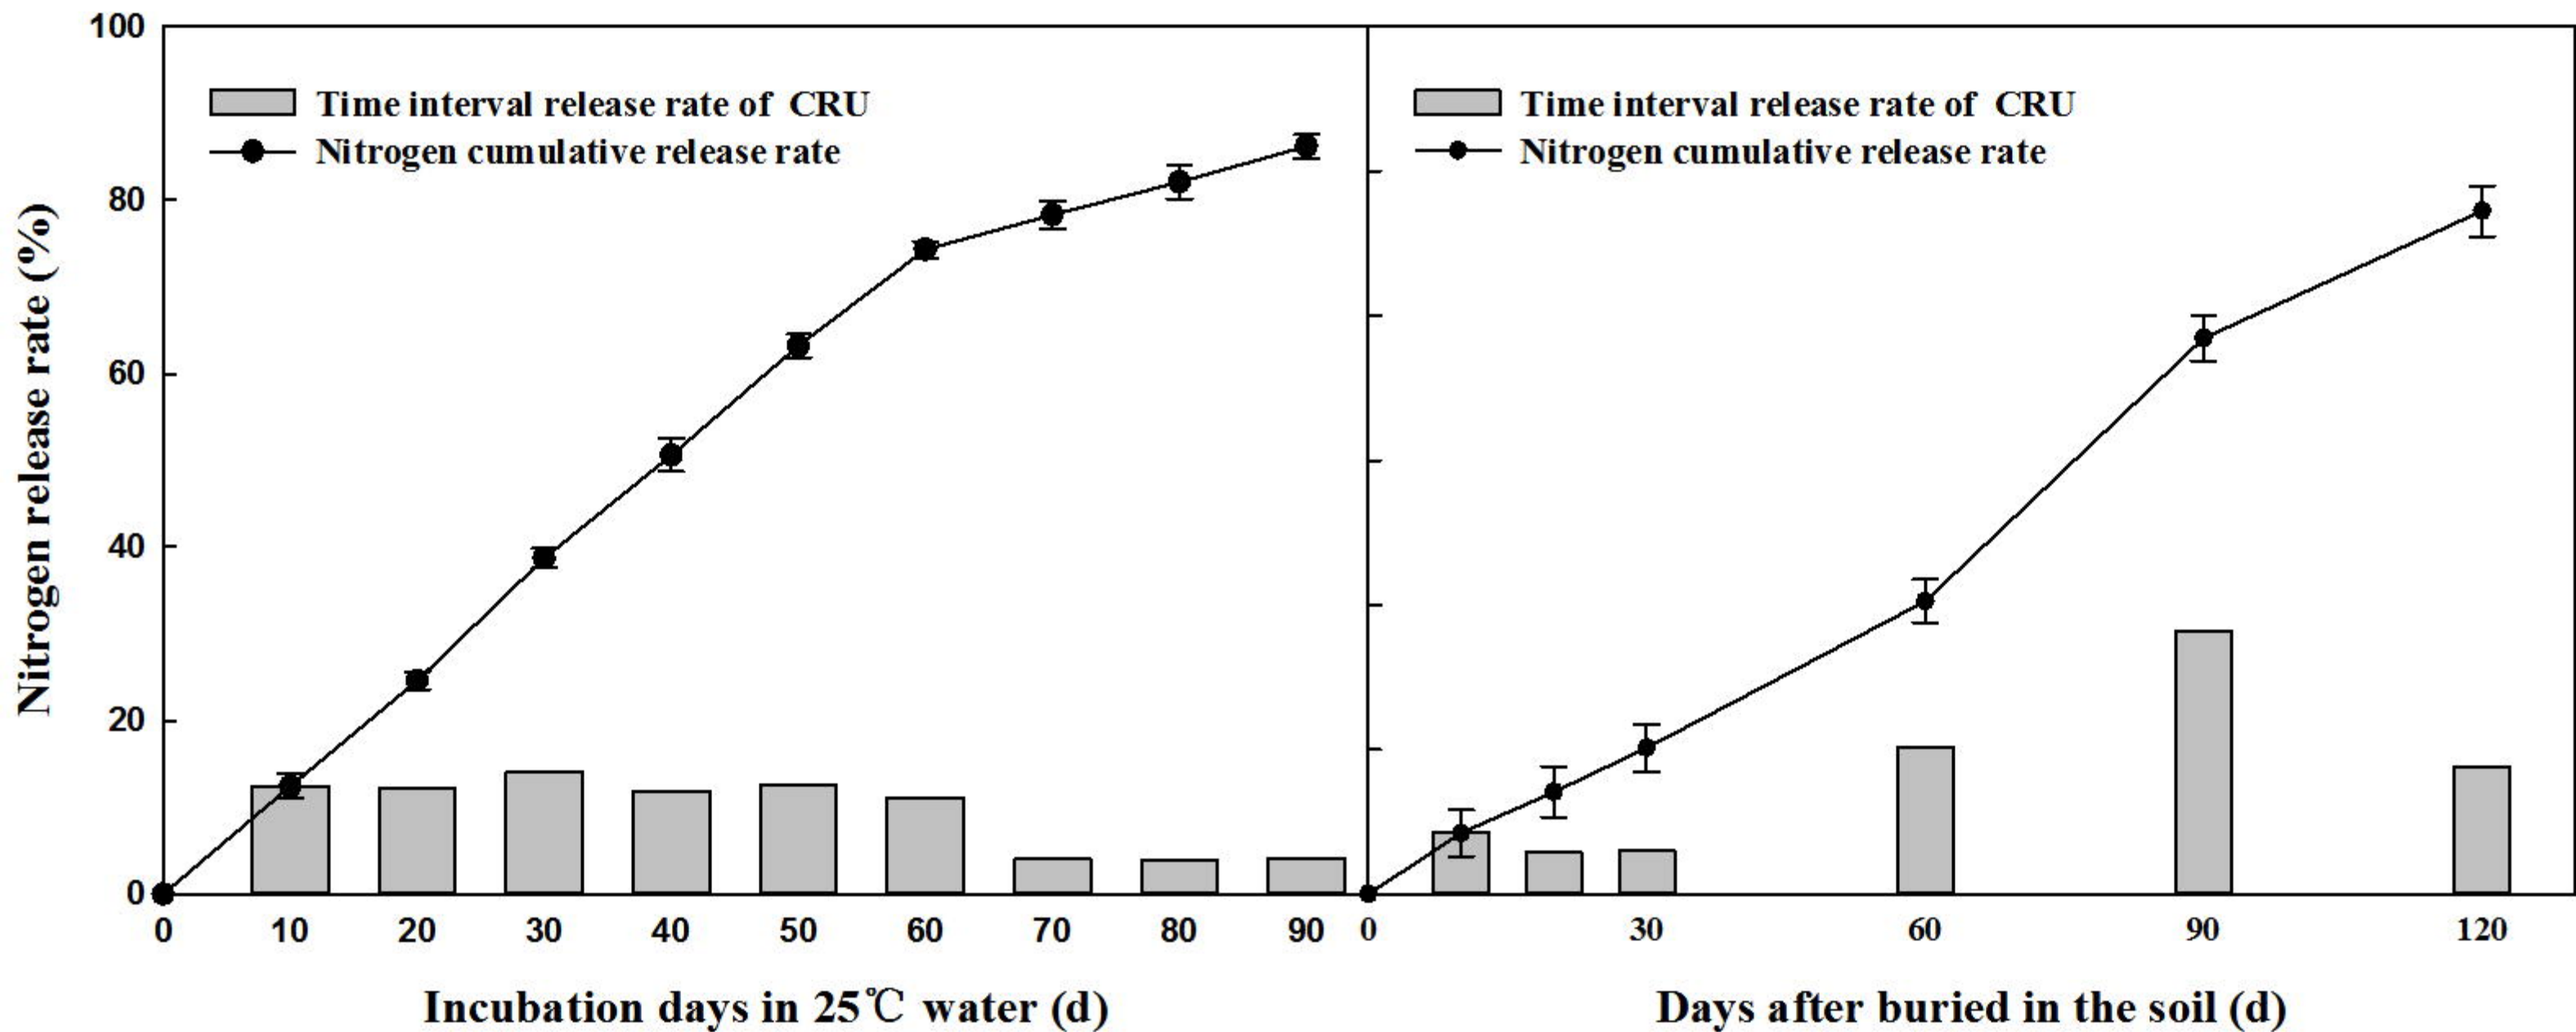

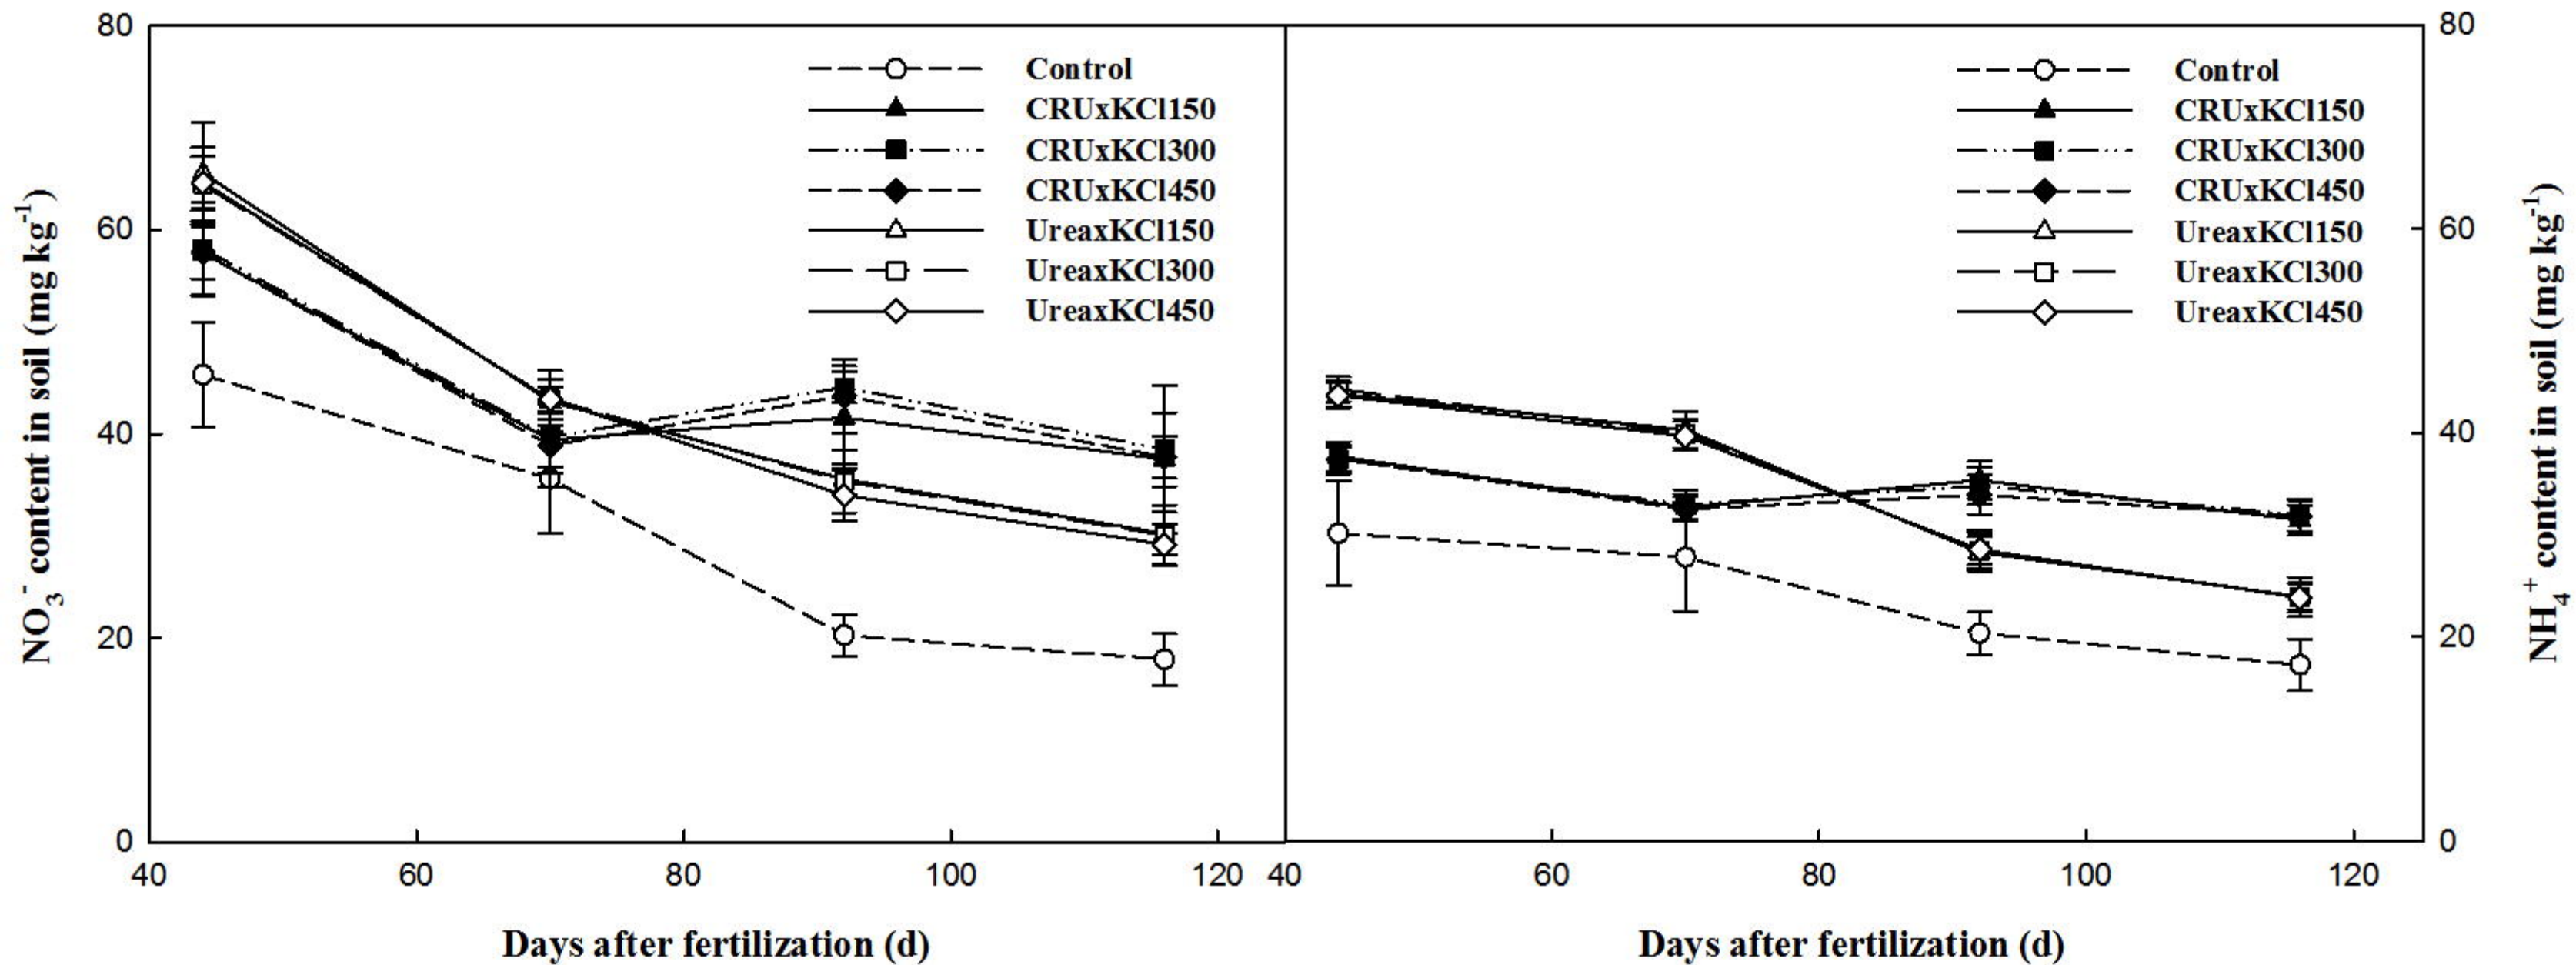

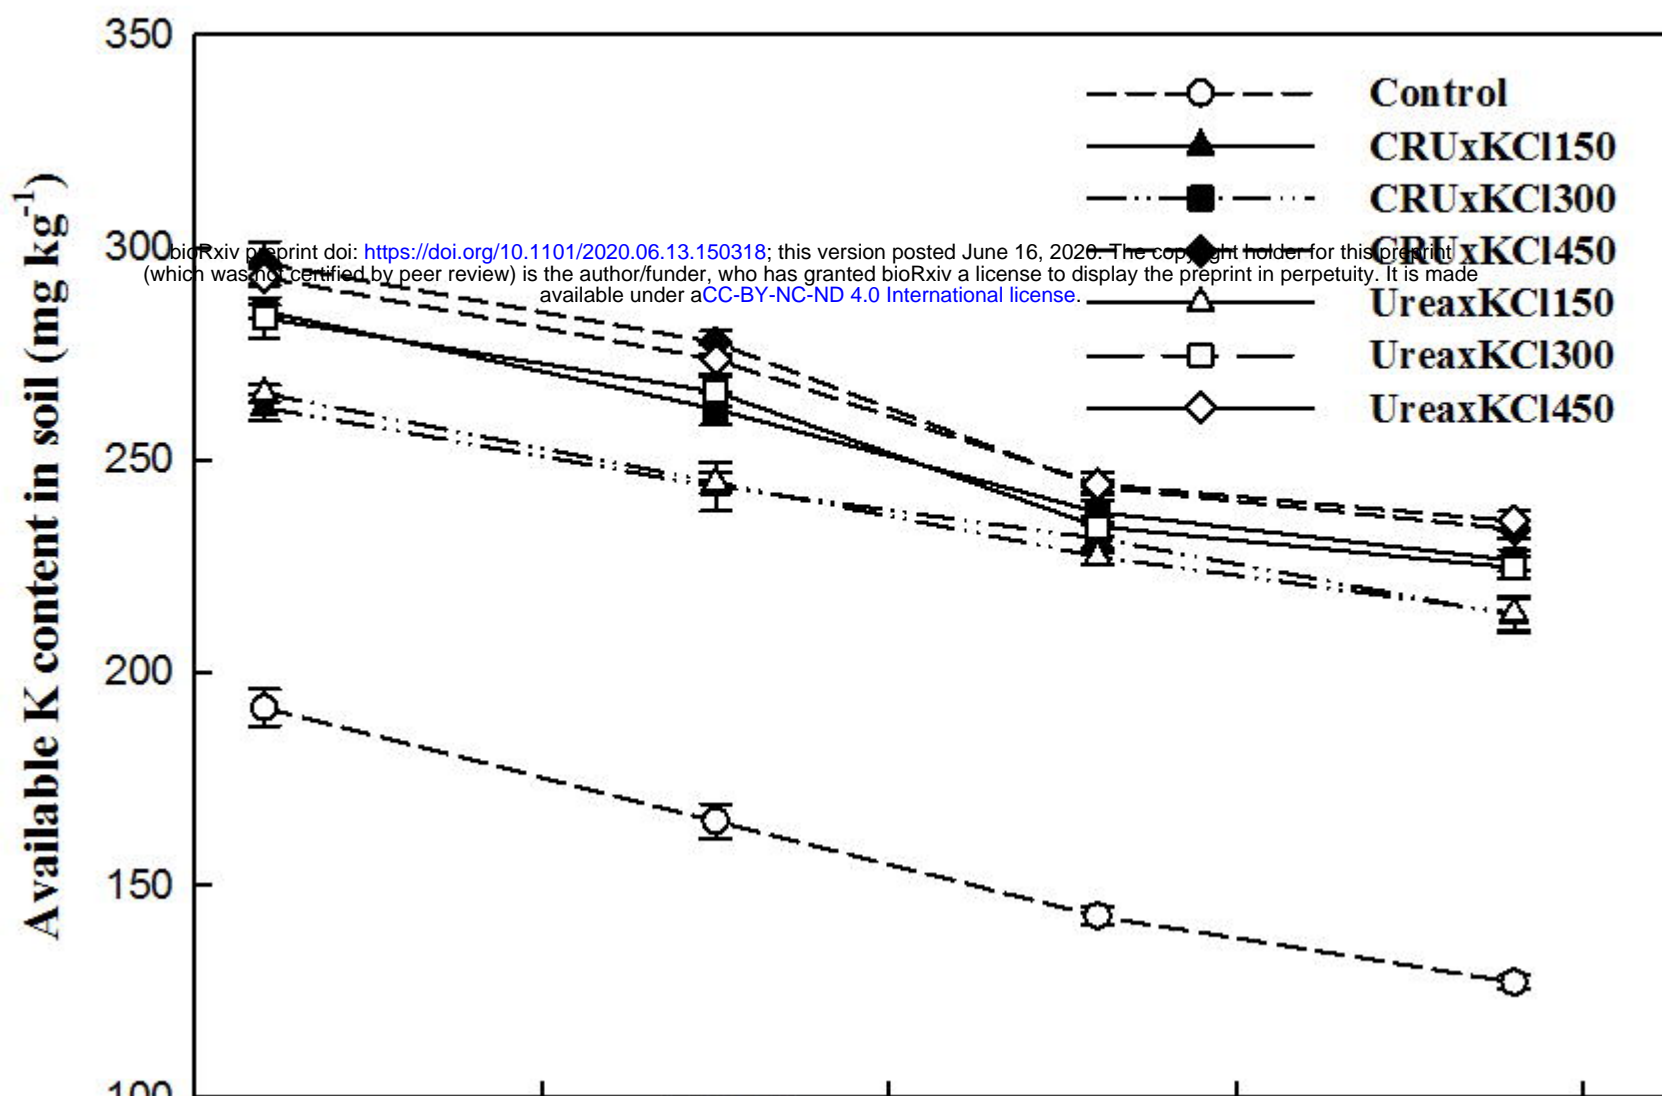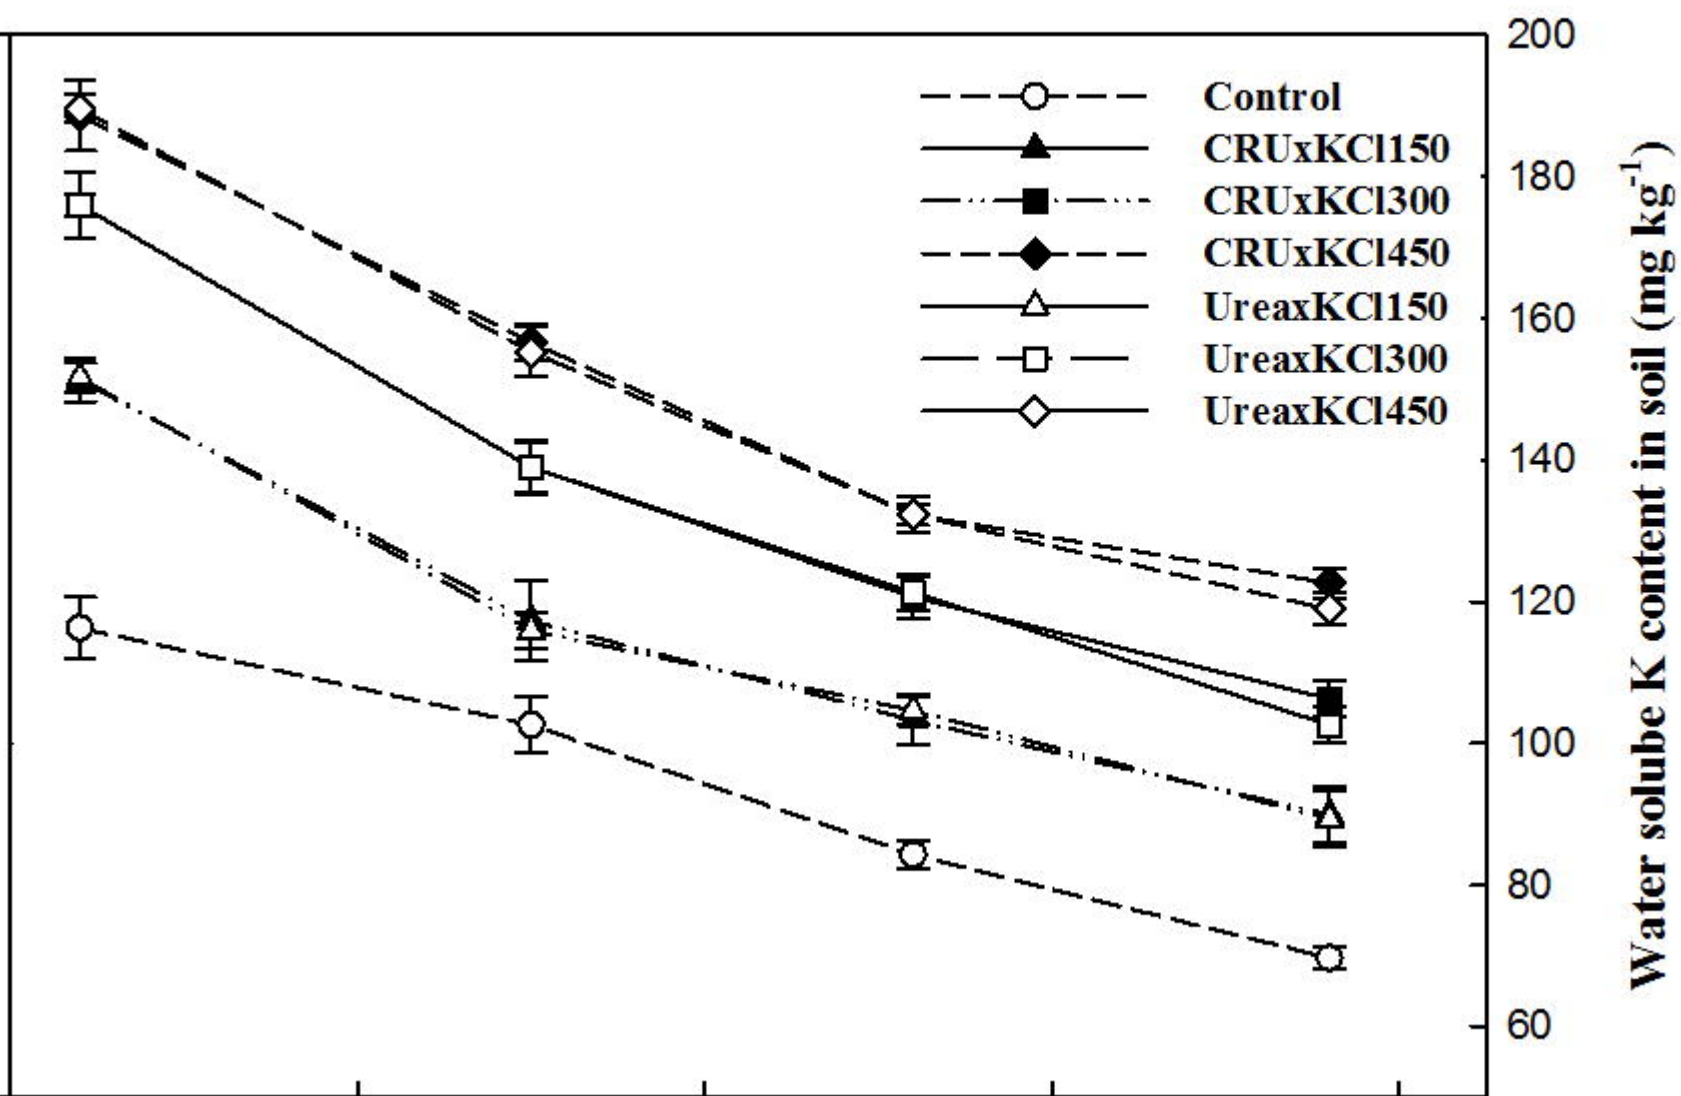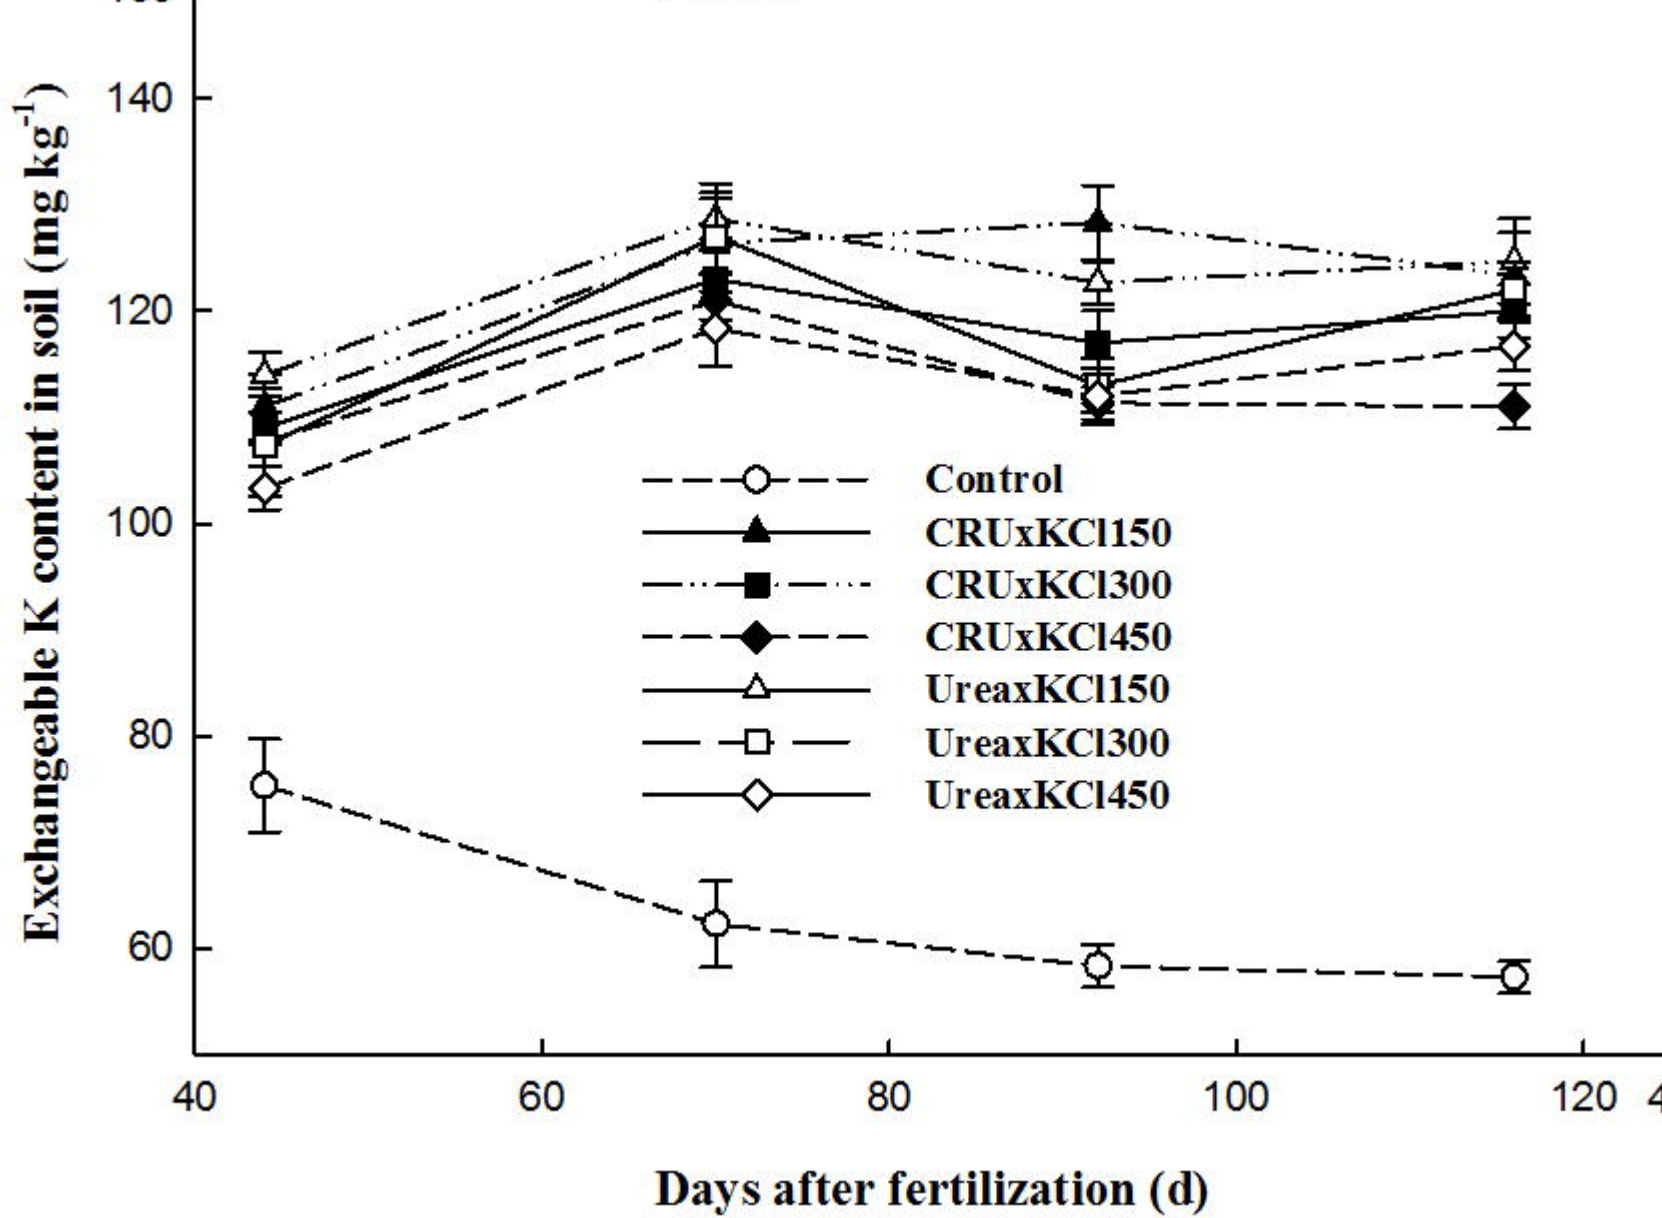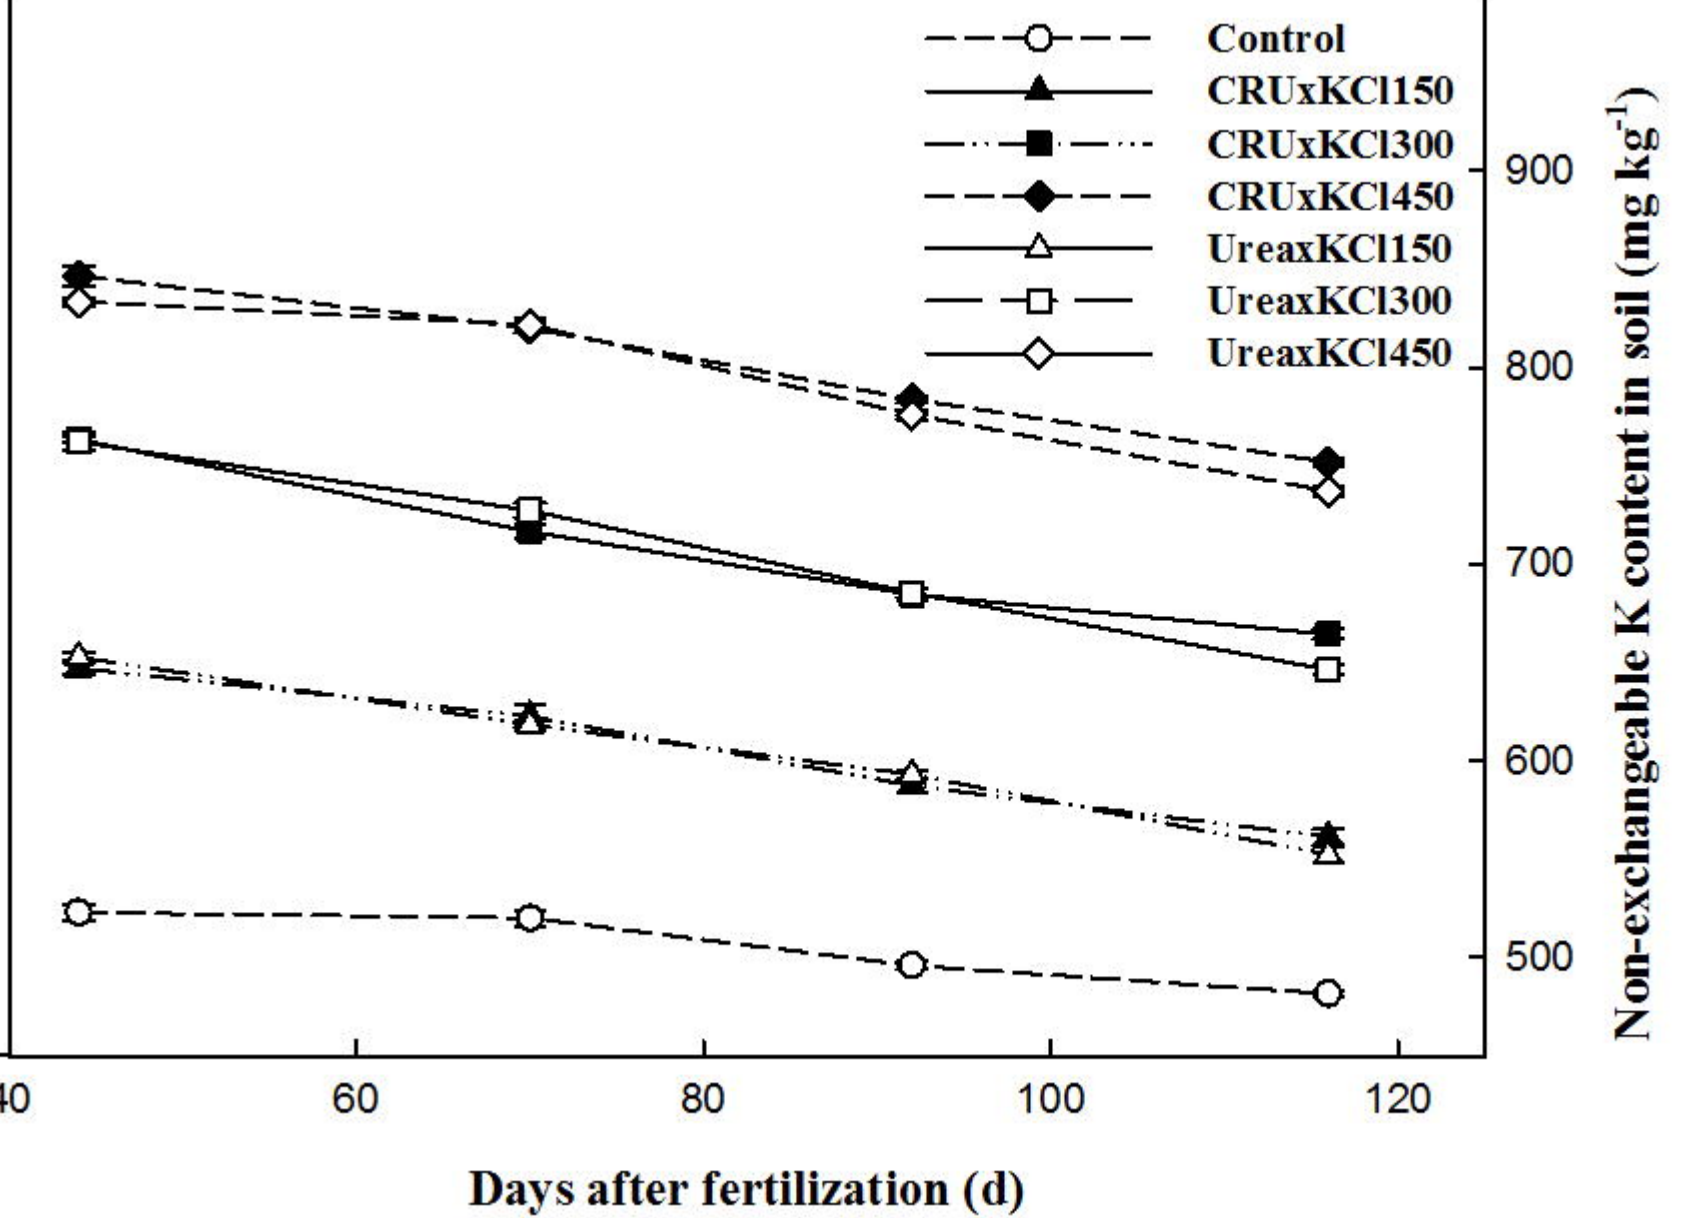

Source: https://www.biorxiv.org/content/10.1101/2020.06.13.150318v1.full.pdf
